# Supplementary material for: Editors’ perspectives on the peer-review process in biomedical journals: protocol for a qualitative study
Source: PubMed Central journal article supplement (PMC6196803; doi:10.1136/bmjopen-2017-020568), 2018-10-18
Supplement: bmjopen-2017-020568.draft_revisions.pdf [file bmjopen-2017-020568.draft_revisions.pdf]

# BMJ Open

BMJ Open is committed to open peer review. As part of this commitment we make the peer review history of every article we publish publicly available.

When an article is published we post the peer reviewers' comments and the authors' responses online. We also post the versions of the paper that were used during peer review. These are the versions that the peer review comments apply to.

The versions of the paper that follow are the versions that were submitted during the peer review process. They are not the versions of record or the final published versions. They should not be cited or distributed as the published version of this manuscript.

BMJ Open is an open access journal and the full, final, typeset and author-corrected version of record of the manuscript is available on our site with no access controls, subscription charges or pay-per-view fees (<http://bmjopen.bmj.com>).

If you have any questions on BMJ Open's open peer review process please email [info.bmjopen@bmj.com](mailto:info.bmjopen@bmj.com)

# BMJ Open

## The editors' perspectives on communication practices within the manuscript review process in biomedical journals: Protocol for a qualitative study

|                                 |                                                                                                                                                                |
|---------------------------------|----------------------------------------------------------------------------------------------------------------------------------------------------------------|
| Journal:                        | <i>BMJ Open</i>                                                                                                                                                |
| Manuscript ID                   | bmjopen-2017-020568                                                                                                                                            |
| Article Type:                   | Protocol                                                                                                                                                       |
| Date Submitted by the Author:   | 09-Nov-2017                                                                                                                                                    |
| Complete List of Authors:       | Glonti, Ketevan; Sveuciliste u Splitu, Faculty of Humanities and Social Sciences<br>Hren, Darko; University of Split, School of Humanities and Social Sciences |
| <b>Primary Subject Heading</b>: | Medical publishing and peer review                                                                                                                             |
| Secondary Subject Heading:      | Qualitative research                                                                                                                                           |
| Keywords:                       | peer review, QUALITATIVE RESEARCH, scientific publishing                                                                                                       |
|                                 |                                                                                                                                                                |

SCHOLARONE™  
Manuscripts

Peer review only

# The editors' perspectives on communication practices within the manuscript review process in biomedical journals: Protocol for a qualitative study

**Authors:** Ketevan Glonti<sup>1,2,3</sup>, Darko Hren<sup>1</sup>

<sup>1</sup> University of Split, School of Humanities and Social Sciences, Split, Croatia. [kglonti@unist.hr](mailto:kglonti@unist.hr), [dhren@unist.hr](mailto:dhren@unist.hr)

<sup>2</sup> University Paris Descartes, Paris, France

<sup>3</sup> METHODS Team, Epidemiology and Biostatistics Sorbonne Paris Cité Research Centre, UMR 1153, INSERM.

**Corresponding author:** Ketevan Glonti, Poljička 35, 21000 Split, Croatia, [kglonti@unist.hr](mailto:kglonti@unist.hr)  
**Tel:** +385 976324635

## Abstract

**Introduction:** Despite dealing with scientific output and potentially having an impact on the quality of research published, the manuscript peer review process itself has at times been criticised for being 'unscientific'. Research indicates that there are social and subjective dimensions of the peer review process that contribute to this perception, including how key stakeholders - namely authors, editors and peer reviewers - communicate. In particular, it has been suggested that the expected roles and tasks of stakeholders need to be more clearly defined and communicated if the manuscript review process is to be improved. Disentangling current communication practices, and outlining the specific roles and tasks of the main actors, might be a first step towards establishing the design of interventions that counterbalance social influences on the peer review process.

The purpose of this article is to present a methodological design for a qualitative study exploring the communication practices within the manuscript review process of biomedical journals from the journal editors' point of view.

**Methods and analysis:** Semi-structured interviews will be carried out with editors of biomedical journals between October 2017 and February 2018. A heterogeneous sample of participants representing a wide range of biomedical journals will be sought through purposive maximum variation sampling, drawing from a professional network of contacts, publishers, conference participants, editors associations and snowballing.

Interviews will be thematically analysed following the method outlined by Braun and Clarke. The qualitative data analysis software NVivo v11 will be used to aid data management and analysis.

**Ethics and dissemination:** This research project was evaluated and approved by the University of Split, Medical School Ethics Committee (2181-198-03-04-17-0029) in May 2017. Findings will be disseminated through a publication in a peer-reviewed journal and presentations during conferences.

**Keywords:** Peer review, Biomedical publishing, Scientific journal publishing, Qualitative research

### Strengths and limitations of this study

- Qualitative analysis of interview data from a wide range of editors of biomedical journals will allow an in-depth understanding of the communication practices prevailing within biomedical journals.
- Quality assurance will be employed throughout data collection and analysis to ensure traceability and verification.
- Journal editors of a selection of biomedical journals will be interviewed; therefore, research findings cannot directly be extrapolated to all biomedical journals and other scientific fields.

### Introduction

Most journals in the biomedical field implement a pre-publication process which primarily involves the interaction of three key stakeholders around an academic research manuscript: journal editors, peer reviewers and authors. This process, typically referred to as ‘peer review’, is strongly embedded in the field of biomedical publishing and in its broadest sense refers to the evaluation of manuscripts submitted for publication by researchers from the same or related areas of expertise. Thus far, there is no universal definition of ‘peer review’, and its specific objectives are not clearly defined (1). Concurrently, the roles, tasks and core competencies expected of peer reviewers and editors have not been formally established and both groups operate largely without formal training (2,3).

The peer review process has at times been criticised for being ‘unscientific’ (4,5). Despite dealing with scientific output that potentially leads to changes in clinical practice, the process itself is not without potential biases - including prestige or association bias, gender bias, confirmation bias, conservatism, bias against interdisciplinary research, publication bias, language bias, and conflict of interest (6,7).

In light of this criticism, there have been several attempts to improve the peer review process and the quality of peer reviewer reports in the biomedical field (8). A recent systematic review evaluating the impact of interventions to improve the quality of peer review for biomedical publications identified 25 strategies that have been implemented, including training interventions; use of checklists (such as Consort (9)); addition of specific experts (i.e. statistical peer reviewers); the introduction of open peer review (i.e., peer reviewers informed that their identity would be revealed) or blinded peer review (i.e., peer reviewers blinded to author names and affiliation); and interventions to increase the speed of the peer review process (10). The authors refrain from providing recommendations regarding the wider implementation of the identified interventions due to their low methodological quality. Other researchers have argued that most of the approaches outlined above fail to compensate for potential biases, and point out that any success so far has been limited (11).

1  
2  
3 Researchers have argued that limited success of interventions might be due to the underlying  
4 nature of peer review, which has been described as an intellectual process that encompasses  
5 objective and subjective elements (12). Editors and peer reviewers bring a diverse mix of skills,  
6 preferences, and intellectual idiosyncrasies to the task (13). At times, these may result in subjective  
7 judgements of manuscript quality. Peer review has also been described as an “inherently human  
8 phenomenon” that is underpinned by social dimensions (14,15). A qualitative study of the social  
9 and subjective dimensions of manuscript peer review in biomedical publishing concluded that  
10 biomedical manuscript review *“is a highly social and subjective process driven by communal as  
11 well as scientific goals, and influenced by reviewers’ and editors’ sense of their own authority,  
12 power, and moral responsibility, as well as by unavoidable prejudice and intuition.”* (16).  
13  
14  
15  
16  
17

18 Our broader research framework aims to generate an understanding of the communication  
19 practices within the editorial and manuscript peer review process in biomedical research.  
20 Disentangling current communication practices for a range of biomedical journals, and outlining  
21 the specific roles and tasks of the main actors might be a first step towards establishing the design  
22 of interventions that counterbalance social influences on the peer review process. In this study, we  
23 aim to identify and characterize the roles and tasks of the different actors in the process of peer  
24 review from the perspective of journal editors.  
25  
26  
27

28 Our specific objectives are:

- 29 1) To examine biomedical editors’ experiences of their interactions with peer reviewers and  
30 authors
- 31 2) To characterize journal editors’ perspectives regarding the roles and tasks of peer reviewers
- 32 3) To explore journal editors’ experiences of communication practices within the manuscript  
33 review process and their views regarding such practices’ potential impact on research  
34 output, namely the fate of individual manuscripts.  
35  
36  
37  
38

## 39 **Methods and analysis**

### 40 **Qualitative approach and research paradigm**

41 Given its underlying social and subjective dimensions (16,17), the need for more qualitative  
42 research into the peer review process within the biomedical field has been recognized for some  
43 time (1). However, to date, most such research has been overwhelmingly quantitative in nature  
44 (18).  
45  
46  
47  
48

49 Drawing on a pragmatist epistemological position that the aim of inquiry cannot be independent  
50 from human experience (19), we considered a qualitative approach to be best suited to answer our  
51 research question. The expectations, understandings, perceptions and thoughts of journal editors  
52 are largely intangible aspects that cannot be unpacked using predefined categories or viewed  
53 independently from the purposes of the peer review process itself.  
54  
55  
56  
57

The use of qualitative interviews will enable participants to speak freely and at length about such aspects, thus providing rich data embedded in personal experiences and practices.

Data will be analysed using thematic analysis as described by Braun and Clarke primarily because of the method's flexibility and epistemological assumptions, that are compatible with a pragmatist approach (20).

Study participants will be offered the possibility of conducting the interview either face-to-face or by phone/conferencing system, according to personal preference and availability. This will also enable the interviewing of people in geographically distant locations.

### Study sample and recruitment

We will use maximum variation purposive sampling to recruit a heterogeneous study sample, allowing us to select journal editors with different characteristics that we anticipate may influence their perspectives. This sampling method enables conceptual exploration using the characteristics of individuals and journals as the basis of selection in order to reflect the diversity and breadth of the sample population, rather than achieving population representativeness (21).

Participants will be recruited through different sources. The study recruitment pathway is shown in Table 1.

**Table 1.** Study recruitment pathways

| Source of participants                                           | Sampling              |
|------------------------------------------------------------------|-----------------------|
| Existing professional networks                                   | Purposive/Snowballing |
| Two research publishers                                          | Purposive/Snowballing |
| International Congress on Peer Review and Scientific Publication | Purposive/Snowballing |
| Editor Associations                                              | Purposive/Snowballing |

Initially, interviewees will be drawn from a professional network of contacts (members of the Methods in Research on Research (MiRoR) project (22)) who are journal editors. They will be interviewed for piloting purposes and requested to recommend additional journal editors whom the lead investigator can interview.

The research publishers BMC (part of Springer Nature) and BMJ are partners of the MiRoR project.

This partnership will be used to recruit interviewees. Editors-in chief operating within the BMJ Publishing Group will be contacted by the lead researcher (KG) via email, provided with study details, and asked to either participate themselves or recommend suitable journal editors who can be contacted instead. One follow-up email will be sent after two weeks to non-respondents.

Due to a different standard operating procedure a different recruitment strategy will be employed at BMC. The publishers' communication manager will communicate with all editors via internal

mail, introduce the lead researcher and the research, and encourage them to respond if interested in participating.

Concurrently, the conference participation lists from the Eight International Congress on Peer Review and Scientific Publication (23) will be reviewed and potential interviewees will be contacted via email by the lead researcher. One follow-up email will be sent to non-respondents after two weeks.

In addition, Editor Associations (Table 2) may be contacted to recruit further study participants in order to obtain maximum variability of editors' characteristics.

**Table 2** – List of Editors Associations

|                                                              |
|--------------------------------------------------------------|
| Asia Pacific Association of Medical Journal Editors (APAME)  |
| Council of Science Editors (CSE)                             |
| European Association of Science Editors (EASE)               |
| Eastern Mediterranean Association of Medical Editors (EMAME) |
| Forum for African Medical Editors (FAME)                     |
| International Committee of Medical Journal Editors (ICMJE)   |
| Japanese Association of Medical Journal Editors (JAMJE)      |
| Korean Association of Medical Journal Editors (KAMJE)        |
| Philippine Association of Medical Journal Editors (PAMJE)    |
| World Association of Medical Editors (WAME)                  |

Following the maximum variation sampling strategy, journal editors who agree to be interviewed will be categorized using the characteristics presented in Table 3, some of which have been shown to influence the peer review process (e.g. gender) (24).

This step will help to determine the characteristics that are under-represented, and inform the sampling strategy for identification of further participants in such a way as to maximize the diversity of interviewees.

**Table 3** – Sample characteristics

| Criteria                    | Characteristics                                                                                                                    |
|-----------------------------|------------------------------------------------------------------------------------------------------------------------------------|
| Demographic characteristics | <ul style="list-style-type: none"> <li>• Gender</li> <li>• Editorial experience</li> <li>• Editors' geographic location</li> </ul> |
| Journal characteristics     | <ul style="list-style-type: none"> <li>• Journal specialty (e.g. Clinical, Public)</li> </ul>                                      |

|  |                                                                                                                                                                                                                                                                                                                                                                                        |
|--|----------------------------------------------------------------------------------------------------------------------------------------------------------------------------------------------------------------------------------------------------------------------------------------------------------------------------------------------------------------------------------------|
|  | <p>Health)</p> <ul style="list-style-type: none"> <li>• Impact factor (journals with or without impact factor)</li> <li>• Peer review practices (closed peer review, open peer review, post-publication peer review)</li> <li>• Publisher (medical publishing companies, independent publisher/university)</li> <li>• Open access, paywall</li> <li>• Size (editorial team)</li> </ul> |
|--|----------------------------------------------------------------------------------------------------------------------------------------------------------------------------------------------------------------------------------------------------------------------------------------------------------------------------------------------------------------------------------------|

Lastly, the journal editor identification process will be supplemented through snowball sampling (25). At the end of each interview, interviewees will be asked to recommend other editors whose experiences might be relevant to the study and who would potentially be interested in contributing to this study. These steps are expected to lead to recommendations that optimize sample variation.

### Saturation

Saturation is a core guiding principle to determine sample sizes in qualitative research, yet few qualitative studies report in detail on the parameters that influenced saturation in their studies (26). In this study we will adopt the seven parameters outlined by Hennink et al. that influence saturation (27) to establish our sample size determinants and demonstrate the grounds upon which saturation will be assessed and achieved, thereby justifying the final sample size. The parameters of saturation and sample size for our study are outlined in Table 4.

The first parameter is the *purpose* of the study, which in this case is to capture themes from the data by using the thematic analysis method. The second parameter is *population*, which should ideally be as heterogeneous as possible. This parameter will be satisfied by interviewing journal editors with different characteristics (i.e. demographic characteristics, journal specialty and journal characteristics). Our *data collection strategy* will be iterative, involving continual data collection until saturation is reached. We aim to collect *thick data*: developing conceptual codes that capture subtle issues. We will develop our *codebook* so that it includes a broad range of codes, including explicit, subtle, and conceptual codes. Lastly, the *saturation goal and focus* of our study is to achieve full understanding of the issues and meanings that emerge from the data. Thus, we aim to reach meaning saturation rather than code saturation (27). Although the process of reaching saturation cannot be quantified in advance and involves an iterative approach until saturation is obtained, we used a recently developed quantitative method to offer an initial estimate of expected number of participants in our study. Following the approach suggested by Fugard and Potts (28) of estimating sample size required to achieve code saturation for studies that use thematic analysis, we calculated that we would need a sample size of at least 38 participants to detect, with 90% power, two instances of a theme with 10% prevalence. Appendix 1 shows the details of the



calculation. This is in line with our previously hypothesized number of participants. Therefore, whilst our core approach to data collection strategy will be iterative, involving continual data collection until saturation is reached, we anticipate around 40 participants to be sufficient to provide us with meaningful information to answer our research questions, in line with similar studies (16).

**Table 4** – Parameters of saturation and sample size

| Parameters                | Sample size determinants of our study | Our study                                                                                                                                     |
|---------------------------|---------------------------------------|-----------------------------------------------------------------------------------------------------------------------------------------------|
| Purpose                   | Capture themes                        | The thematic analysis method will be used to identify themes and patterns of meanings across the dataset in relation to the research question |
| Population                | Heterogeneous                         | Journal editors with different characteristics (i.e. demographic characteristics, journal discipline and characteristics)                     |
| Sampling strategy         | Iterative sample                      | Purposive sampling using established networks; enlarged through snowballing                                                                   |
| Data quality              | Thick data                            | Experiences and opinions will be captured                                                                                                     |
| Type of codes             | Conceptual codes                      | Explicit and subtle                                                                                                                           |
| Codebook                  | Emerging codebook                     | Inductive coding derived from data content                                                                                                    |
| Saturation goal and focus | Code meaning                          | Referring to saturation as the point where the issues are fully understood and when no further dimensions, nuances, and insights can be found |

### Inclusion criteria and recruitment process

Study participants will consist of journal editors of biomedical journals, referring to individuals who are currently involved in the communication process between authors and peer reviewers and therefore in a position to decide about the fate of manuscripts; and/or contribute to the determination of journal content and policy. Journal editors will be contacted between October 2017 and February 2018. They will be sent an invitation email and information sheet by the lead author (KG), followed by a phone call to determine if they are interested in participating in the study. Written informed consent will be obtained from all participants prior to conducting the interviews.

### Interview guide

A preliminary topic guide for the semi-structured interviews (see Table 5) has been developed, informed by the outcomes of a previously conducted scoping review of the literature (29). The

topic guide was piloted on four editors to assess usefulness and meaningfulness of the questions, the ease of administration, language and length, and to refine the topic guide. It is likely that the topic guide will be refined further after conducting more interviews.

**Table 5** – Draft topic guide for semi-structured interviews

| Key area of investigation                | Topics                                                                                                                                                     | Questions and prompts                                                                                                                                                                                                                                                                                                                                                                                                                                                                                                                                                                                                                                                                                                                                                                                                                                                                                                                                                                                                                                                                                                                                                                                                                                                                                                                                                                                                                                                                |
|------------------------------------------|------------------------------------------------------------------------------------------------------------------------------------------------------------|--------------------------------------------------------------------------------------------------------------------------------------------------------------------------------------------------------------------------------------------------------------------------------------------------------------------------------------------------------------------------------------------------------------------------------------------------------------------------------------------------------------------------------------------------------------------------------------------------------------------------------------------------------------------------------------------------------------------------------------------------------------------------------------------------------------------------------------------------------------------------------------------------------------------------------------------------------------------------------------------------------------------------------------------------------------------------------------------------------------------------------------------------------------------------------------------------------------------------------------------------------------------------------------------------------------------------------------------------------------------------------------------------------------------------------------------------------------------------------------|
| Background information                   | <ul style="list-style-type: none"> <li>- Explore personal background</li> <li>- Level of experience</li> <li>- Own roles and tasks as an editor</li> </ul> | <ul style="list-style-type: none"> <li>• Tell me about your journal and the job you have.</li> <li>• How long have you been in this position?</li> <li>• What are your current responsibilities?</li> <li>• Did you hold any other positions in the same field before your current position? If yes, what were your responsibilities then?</li> </ul>                                                                                                                                                                                                                                                                                                                                                                                                                                                                                                                                                                                                                                                                                                                                                                                                                                                                                                                                                                                                                                                                                                                                |
| Journal set-up                           | <ul style="list-style-type: none"> <li>- Explore journal set-up</li> </ul>                                                                                 | <ul style="list-style-type: none"> <li>• Tell me about your journal - how does it work?</li> <li>• How does the peer review process work in your journal?</li> <li>• What do you do within the process?</li> </ul>                                                                                                                                                                                                                                                                                                                                                                                                                                                                                                                                                                                                                                                                                                                                                                                                                                                                                                                                                                                                                                                                                                                                                                                                                                                                   |
| Opinion on peer reviewers role and tasks | <ul style="list-style-type: none"> <li>- Roles and tasks of peer reviewers</li> <li>- Expectations</li> </ul>                                              | <ul style="list-style-type: none"> <li>• What do you expect from peer reviewers in terms of their roles and tasks?</li> <li>• How do you let your reviewers know what you expect from them?</li> </ul> <p><b>Prompt</b> on whatever has not been mentioned:</p> <ul style="list-style-type: none"> <li>• Attitudes and beliefs (about role and tasks)</li> <li>• Organisational expectations (about role and tasks)</li> </ul> <ul style="list-style-type: none"> <li>• Can you tell me about a specific situation when you were not satisfied with a review or with a peer reviewer?</li> <li>• What did you do in that a situation?</li> </ul> <p><b>Prompt:</b> looks for factors other than being late with a review, or not doing a review once they have accepted it</p> <ul style="list-style-type: none"> <li>• Can you tell me about a situation when you were exceptionally satisfied with a review or with a peer reviewer?</li> <li>• Were there situations (in regards to the roles and task of reviewers) when you disagreed with the other editors you work with? What about? What happened?</li> <li>• What about other journals, do roles and tasks differ among journals in your field?</li> </ul> <p><b>Prompt:</b> If yes (i.e. differences exist), then:</p> <ul style="list-style-type: none"> <li>• How does this affect the process?</li> <li>• How does it affect your communication?</li> <li>• How do you negotiate those differences? Does it</li> </ul> |

1  
2  
3  
4  
5  
6  
7  
8  
9  
10  
11  
12  
13  
14  
15  
16  
17  
18  
19  
20  
21  
22  
23  
24  
25  
26  
27  
28  
29  
30  
31  
32  
33  
34  
35  
36  
37  
38  
39  
40  
41  
42  
43  
44  
45  
46  
47  
48  
49  
50  
51  
52  
53  
54  
55  
56  
57  
58  
59  
60

|                                                           |                                                                                                                                             | matter?                                                                                                                                                                                                                                                                                                                                                                                                                           |
|-----------------------------------------------------------|---------------------------------------------------------------------------------------------------------------------------------------------|-----------------------------------------------------------------------------------------------------------------------------------------------------------------------------------------------------------------------------------------------------------------------------------------------------------------------------------------------------------------------------------------------------------------------------------|
| Communication between editors, peer reviewers and authors | <ul style="list-style-type: none"> <li>- Communication between the three parties</li> <li>- Potential conflicts</li> <li>- Power</li> </ul> | <ul style="list-style-type: none"> <li>• Can you describe your experience of the communication process between editors, authors and peer reviews?</li> <li>• How do you communicate with authors and peer reviewers?</li> <li>• Can you give me some specific examples of situations where this communication is challenging?</li> </ul> <p><b>Prompt:</b><br/>What are potential conflicts?<br/>When do disagreements arise?</p> |
| Conclusion                                                | <ul style="list-style-type: none"> <li>- Snowballing</li> <li>- Documents</li> <li>- Final comments</li> </ul>                              | <ul style="list-style-type: none"> <li>• Is there anybody else whom you think I should speak to?</li> <li>• Any articles/documents I can access/should look at?</li> <li>• Any final comments? Is there anything else that you think is important to mention?</li> </ul>                                                                                                                                                          |

### Data collection and recording

All interviews will be conducted by the principal researcher (KG) either face-to-face or by phone or online call (e.g. Skype or conferencing system), according to the circumstances and preferences of the interviewees.

With the permission of the participants, interviews will be audio-recorded and notes will be taken.

Interviewees will be asked if they could be contacted again if further clarification is needed.

Based on the pilot interviews it is anticipated that interviews will take around 30 minutes to complete.

### Data analysis

Data will be analysed using Braun and Clarke's (20) 6-phase method for thematic analysis (TA). This analytic framework assumes that truth can be accessed through language, but that accounts and experiences are socially mediated (30). It is not bound to any pre-existing theoretical framework, therefore it offers relative theoretical independence and compatibility with various approaches which is compatible with pragmatist position that we subscribe to (31). TA has also been described as a more accessible form of analysis compared to other approaches (e.g. grounded theory) that requires less detailed theoretical and technical knowledge, and is therefore particularly suitable for the lead researcher (KG) of this study who is at an early stage of her qualitative research experience (20).

The principal researcher will conduct all interviews, which will be transcribed verbatim.

An Excel spreadsheet will be used to log all details related to data collection (e.g. interview schedule, field notes) processing (e.g. transcription, coding and analysis) and progress throughout.

Data analysis will take place concurrently with data collection in an iterative cycle. This serves two purposes; firstly, it will help to further refine the topic guide, and allow the interviewer (KG) to reflect with the senior investigator (DH) on her own interviewing technique and style for subsequent interviews. Secondly, it will help the researchers to determine when saturation occurs.

1  
2  
3 The process will begin with initial reflections after each interview. These will be recorded (in the  
4 Excel sheet) as field notes. This diary will be kept during data collection and data analysis to  
5 capture impressions from interviews (such as initial themes) and highlight the decision-making  
6 process leading to the development of initial and final themes.  
7  
8

9  
10 The step-by-step approach by Nowell et al. that provides a detailed description and pragmatic  
11 approach of how to conduct a trustworthy TA will be followed (32).

12 The first phase will start by familiarizing with the data - re-reading each transcript at least twice  
13 and noting down initial ideas.  
14

15 In the second phase initial codes will be generated across the entire dataset using the inductive  
16 approach, whereby codes are developed line-by-line from the interview content, focusing on the  
17 identification of both semantic (i.e. reflecting the explicit content) and latent (i.e. reflect the  
18 implicit content) features (20). All coding will be performed by both researchers KG and DH to  
19 increase credibility of the analysis. The qualitative data analysis software NVivo v.11 will be used  
20 to aid data management and analysis (i.e. indexing of coding and transcripts). In order to ensure  
21 consistency a code manual will be developed prior to the in-depth analysis.  
22

23 In the third phase the codes will be clustered into potential themes to give an indication of their  
24 prevalence for the assessment of (code or meaning) saturation, and into a preliminary thematic  
25 map displaying the main themes.  
26

27 The fourth phase will consist of reviewing themes and will be divided into two stages; the  
28 reviewing and refining of the data at the level of the coded data extracts, and subsequently at the  
29 level of the entire data set. These two stages will lead to the generation of a thematic map of the  
30 analysis.  
31

32 The aim of the next phase will be to definitively define the scope and content of each relevant  
33 theme and precisely name them. This will involve debriefing between the study team. Debriefing  
34 with an outside expert (on peer review in biomedical journals) as suggested by King (33) will be  
35 conducted to ensure that themes are sufficiently clear to someone outside of the immediate  
36 research team.  
37  
38  
39  
40

41 After the establishment of the final themes, the last phase will consist of writing up the study  
42 findings as a journal article. Direct quotes will be used to illustrate specific points of interpretation  
43 and the extraction of themes. All themes and subthemes will be presented in the result section and  
44 discussed in the light of existing literature.  
45  
46  
47

### 48 Securing study quality

49 In order to establish trustworthiness and credibility of data analysis the practical procedures  
50 outlined by Nowell et al. will be followed at each stage of analysis (32).

51 Additionally, respondent validation will be sought by inviting interviewees to comment on the  
52 interpretation of their interview (i.e. final themes and coding) (34).  
53  
54  
55  
56  
57

1  
2  
3 We will use the consolidated criteria for reporting qualitative research (COREQ) to provide  
4 detailed reporting of methods used (35).  
5  
6

### 7 **Ethical considerations**

8 Interviewees will receive an information sheet about the research and a consent form before the  
9 interview. The information letter includes details on the maintenance of anonymity and  
10 confidentiality throughout the research process. Prior to the interview, information from the  
11 information sheet and consent form will be reiterated verbally, and interviewees will be asked to  
12 consent to participation and recording of their interviews. Participants will be able to choose not to  
13 be directly quoted in any publications resulting from the study.  
14  
15  
16

### 17 **Potential use of the study**

18 This research has multiple potential uses. As a standalone research piece it will generate context-  
19 based information from journal editors' perspectives that will help to provide insight into the  
20 communication patterns within biomedical journals, including differences and similarities across  
21 biomedical journals. It is also embedded within a larger project that will inform the development  
22 of a taxonomy of peer reviewers' roles and tasks, potentially leading to the establishment of a set  
23 of core competencies for peer reviewers of biomedical journals.  
24  
25

26 The study findings can further be used to inform biomedical journal policies and develop training  
27 courses for peer reviewers and journal editors.  
28  
29  
30

31 **Ethical approval** This project has been evaluated and approved by the University of Split, Medical  
32 School Ethics Committee (2181-198-03-04-17-0029) in May 2017.  
33  
34

### 35 **Acknowledgements**

36 The authors would like to thank Professor Erik Cobo for providing advice during the writing of  
37 this protocol and Dr Sara Schroter (BMJ) and Dr Elizabeth Moylan (BMC) for providing guidance  
38 and help on the recruitment strategy of interviewees.  
39  
40

41 **Contributors** All authors have made substantive intellectual contributions to the development of  
42 this protocol. KG conceptualized the study approach and led the writing of the manuscript. DH led  
43 the supervision of the manuscript preparation. DH was involved in developing the study questions  
44 and design and provided detailed comments on earlier drafts.  
45  
46

47 **Funding** This project was supported by the European Union's Horizon 2020 research and  
48 innovation programme under the Marie Skłodowska-Curie grant agreement No 676207. The  
49 funders had no role in the study design, data collection and analysis, decision to publish, or  
50 preparation of the manuscripts.  
51  
52

53 **Competing interests** At the time of the submission of this protocol KG conducted a secondment at the  
54 BMJ.  
55  
56  
57

## References

1. Overbeke J, Wager E. 3: The state of evidence: what we know and what we don't know about journal peer review. *JAMA*. 1994;272:79–174.
2. Galipeau J, Barbour V, Baskin P, Bell-Syer S, Cobey K, Cumpston M, et al. A scoping review of competencies for scientific editors of biomedical journals. *BMC Med*. 2016 Feb 2;14:1–17.
3. Moher D, Galipeau J, Alam S, Barbour V, Bartolomeos K, Baskin P, et al. Core competencies for scientific editors of biomedical journals: consensus statement. *BMC Med*. 2017 Sep 11;15(1):167.
4. Smith R. Peer review: a flawed process at the heart of science and journals. *J R Soc Med* [Internet]. 2006;99. Available from: <http://dx.doi.org/10.1258/jrsm.99.4.178>
5. Rennie D. Make peer review scientific. *Nature*. 2016;535(7610):31–3.
6. Silva PUKD, Vance CK. Preserving the Quality of Scientific Research: Peer Review of Research Articles. In: *Scientific Scholarly Communication* [Internet]. Springer International Publishing; 2017 [cited 2017 Apr 18]. p. 73–99. (Fascinating Life Sciences). Available from: [http://link.springer.com/chapter/10.1007/978-3-319-50627-2\\_6](http://link.springer.com/chapter/10.1007/978-3-319-50627-2_6)
7. Lee CJ, Sugimoto CR, Zhang G, Cronin B. Bias in peer review. *J Am Soc Inf Sci Technol*. 2013 Jan 1;64(1):2–17.
8. Jefferson T, Rudin M, Brodny Folse S. Editorial peer review for improving the quality of reports of biomedical studies. *Cochrane Database Syst Rev*. 2007;2.
9. Altman DG, Schulz KF, Moher D. The revised CONSORT statement for reporting randomized trials: explanation and elaboration. *Ann Intern Med* [Internet]. 2001;134. Available from: <http://dx.doi.org/10.7326/0003-4819-134-8-200104170-00012>
10. Bruce R, Chauvin A, Trinquart L, Ravaud P, Boutron I. Impact of interventions to improve the quality of peer review of biomedical journals: a systematic review and meta-analysis. *BMC Med*. 2016;14(1):85.
11. Hojat M, Gonnella JS, Caellegh AS. Impartial judgment by the “gatekeepers” of science: fallibility and accountability in the peer review process. *Adv Health Sci Educ Theory Pract*. 2003;8(1):75–96.
12. Kassirer JP, Campion EW. Peer review: crude and understudied, but indispensable. *Jama*. 1994;272(2):96–7.
13. King CR, McGuire DB, Longman AJ, Carroll-Johnson RM. Peer review, authorship, ethics, and conflict of interest. *Image J Nurs Sch*. 1997 May;29(2):163–7.
14. Horn SA. The Social and Psychological Costs of Peer Review: Stress and Coping With Manuscript Rejection. *J Manag Inq*. 2016 Jan 1;25(1):11–26.

15. Bedeian AG. Peer Review and the Social Construction of Knowledge in the Management Discipline. *Acad Manag Learn Educ*. 2004 Jun 1;3(2):198–216.
16. Lipworth WL, Kerridge IH, Carter SM, Little M. Journal peer review in context: A qualitative study of the social and subjective dimensions of manuscript review in biomedical publishing. *Soc Sci Med*. 2011 Apr;72(7):1056–63.
17. Lipworth W, Kerridge I. Shifting Power Relations and the Ethics of Journal Peer Review. *Soc Epistemol*. 2011 Jan 1;25(1):97–121.
18. Shashok K. Standardization vs Diversity: How Can We Push Peer Review Research Forward? *Medscape Gen Med*. 2005 Feb 16;7(1):11.
19. Yardley L, Bishop F. Mixing Qualitative and Quantitative Methods: A Pragmatic Approach. In: Willig C, Stainton-Rogers W, editors. *Qualitative Research in Psychology*. Thousand Oaks (CA): SAGE Publication Ltd.; p. 352–69.
20. Braun V, Clarke V. Using thematic analysis in psychology. *Qual Res Psychol*. 2006;3(2):77–101.
21. Patton M. *Qualitative Research and Evaluation Methods*, 209-339. 2002;
22. Projet MiRoR | An innovative and ambitious joint doctoral training programme [Internet]. [cited 2017 May 2]. Available from: <http://mirror-ejd.eu/>
23. Rennie D, Flanagan A, Godlee F, Bloom T. The Eighth International Congress on Peer Review and Biomedical Publication: A Call for Research. *JAMA*. 2015 May 26;313(20):2031–2.
24. Fox CW, Burns CS, Meyer JA. Editor and reviewer gender influence the peer review process but not peer review outcomes at an ecology journal. *Funct Ecol*. 2016;30(1):140–53.
25. Morgan DL. Sample size. *Sage Encycl Qual Res Methods*. 2008;798.
26. Marshall B, Cardon P, Poddar A, Fontenot R. Does Sample Size Matter in Qualitative Research?: A Review of Qualitative Interviews in is Research. *J Comput Inf Syst*. 2013 Sep 1;54(1):11–22.
27. Hennink MM, Kaiser BN, Marconi VC. Code Saturation Versus Meaning Saturation: How Many Interviews Are Enough? *Qual Health Res*. 2016;1049732316665344.
28. Fugard AJB, Potts HWW. Supporting thinking on sample sizes for thematic analyses: a quantitative tool. *Int J Soc Res Methodol*. 2015 Nov 2;18(6):669–84.
29. Glonti K, Cauchi D, Cobo E, Boutron I, Moher D, Hren D. A scoping review protocol on the roles and tasks of peer reviewers in the manuscript review process in biomedical journals. *BMJ Open*. 2017 Oct 1;7(10):e017468.

- 1  
2  
3 30. Madill A, Jordan A, Shirley C. Objectivity and reliability in qualitative analysis: realist,  
4 contextualist and radical constructionist epistemologies. *Br J Psychol Lond Engl* 1953. 2000  
5 Feb;91 ( Pt 1):1–20.  
6  
7  
8 31. Creswell JW, Poth CN. *Qualitative inquiry and research design: Choosing among five*  
9 *approaches*. Sage publications; 2017.  
10  
11 32. Thematic Analysis *International Journal of Qualitative Methods* - Lorelli S. Nowell, Jill M.  
12 Norris, Deborah E. White, Nancy J. Moules, 2017 [Internet]. [cited 2017 Oct 31]. Available  
13 from: <http://journals.sagepub.com.liverpool.idm.oclc.org/doi/full/10.1177/1609406917733847>  
14  
15 33. King N. Using templates in the thematic analysis of text. *Essent Guide Qual Methods Organ*  
16 *Res*. 2004;2:256–70.  
17  
18 34. Long T, Johnson M. Rigour, reliability and validity in qualitative research. *Clin Eff Nurs*.  
19 2000;4(1):30–7.  
20  
21  
22 35. Tong A, Sainsbury P, Craig J. Consolidated criteria for reporting qualitative research  
23 (COREQ): a 32-item checklist for interviews and focus groups. *Int J Qual Health Care*. 2007  
24 Dec 1;19(6):349–57.  
25  
26  
27  
28  
29  
30  
31  
32  
33  
34  
35  
36  
37  
38  
39  
40  
41  
42  
43  
44  
45  
46  
47  
48  
49  
50  
51  
52  
53  
54  
55  
56  
57  
58  
59  
60



## Appendix 1. Sample size calculation

```
sampSizeForQual = function(Power, ThemePrevalence, NumInstances) { qnbinom(Power, size =  
NumInstances, prob = ThemePrevalence) + NumInstances  
}  
  
sampSizeForQual(0.9, 0.1, 2)  
[1] 38
```

Code run via R-Fiddle (<http://www.r-fiddle.org>)

# BMJ Open

## The editors' perspectives on the peer review process in biomedical journals: Protocol for a qualitative study

|                                 |                                                                                                                                                                                                                                                                                                                                                                                |
|---------------------------------|--------------------------------------------------------------------------------------------------------------------------------------------------------------------------------------------------------------------------------------------------------------------------------------------------------------------------------------------------------------------------------|
| Journal:                        | <i>BMJ Open</i>                                                                                                                                                                                                                                                                                                                                                                |
| Manuscript ID                   | bmjopen-2017-020568.R1                                                                                                                                                                                                                                                                                                                                                         |
| Article Type:                   | Protocol                                                                                                                                                                                                                                                                                                                                                                       |
| Date Submitted by the Author:   | 15-May-2018                                                                                                                                                                                                                                                                                                                                                                    |
| Complete List of Authors:       | Glonti, Ketevan; Sveuciliste u Splitu, School of Humanities and Social Sciences; Paris Descartes University, Sorbonne Paris Cité, INSERM, U1153 Epidemiology and Biostatistics Sorbonne Paris Cité Research Center (CRESS), Methods of therapeutic evaluation of chronic diseases Team (METHODS)<br>Hren, Darko; University of Split, School of Humanities and Social Sciences |
| <b>Primary Subject Heading</b>: | Medical publishing and peer review                                                                                                                                                                                                                                                                                                                                             |
| Secondary Subject Heading:      | Qualitative research                                                                                                                                                                                                                                                                                                                                                           |
| Keywords:                       | peer review, QUALITATIVE RESEARCH, scientific publishing                                                                                                                                                                                                                                                                                                                       |
|                                 |                                                                                                                                                                                                                                                                                                                                                                                |

SCHOLARONE™  
Manuscripts

# The editors' perspectives on the peer review process in biomedical journals: Protocol for a qualitative study

**Authors:** Ketevan Glonti<sup>1,2</sup>, Darko Hren<sup>1</sup>

<sup>1</sup> University of Split, School of Humanities and Social Sciences, Split, Croatia. [kglonti@unist.hr](mailto:kglonti@unist.hr), [dhren@unist.hr](mailto:dhren@unist.hr)

<sup>2</sup> INSERM, U1153 Epidemiology and Biostatistics Sorbonne Paris Cité Research Center (CRESS), Methods of therapeutic evaluation of chronic diseases Team (METHODS), Paris, F-75014 France; Paris Descartes University, Sorbonne Paris Cité, France.

**Corresponding author:** Ketevan Glonti, Poljička 35, 21000 Split, Croatia, [kglonti@unist.hr](mailto:kglonti@unist.hr)  
**Tel:** +385 976324635

## Abstract

**Introduction:** Despite dealing with scientific output and potentially having an impact on the quality of research published, the manuscript peer review process itself has at times been criticised for being 'unscientific'. Research indicates that there are social and subjective dimensions of the peer review process that contribute to this perception, including how key stakeholders - namely authors, editors and peer reviewers - communicate. In particular, it has been suggested that the expected roles and tasks of stakeholders need to be more clearly defined and communicated if the manuscript review process is to be improved. Disentangling current communication practices, and outlining the specific roles and tasks of the main actors, might be a first step towards establishing the design of interventions that counterbalance social influences on the peer review process.

The purpose of this article is to present a methodological design for a qualitative study exploring the communication practices within the manuscript review process of biomedical journals from the journal editors' point of view.

**Methods and analysis:** Semi-structured interviews will be carried out with editors of biomedical journals between October 2017 and February 2018. A heterogeneous sample of participants representing a wide range of biomedical journals will be sought through purposive maximum variation sampling, drawing from a professional network of contacts, publishers, conference participants, editors associations and snowballing.

Interviews will be thematically analysed following the method outlined by Braun and Clarke. The qualitative data analysis software NVivo v11 will be used to aid data management and analysis.

**Ethics and dissemination:** This research project was evaluated and approved by the University of Split, Medical School Ethics Committee (2181-198-03-04-17-0029) in May 2017. Findings will be disseminated through a publication in a peer-reviewed journal and presentations during conferences.

**Keywords:** Peer review, Biomedical publishing, Scientific journal publishing, Qualitative research

## Strengths and limitations of this study

- Qualitative analysis of interview data from a wide range of editors of biomedical journals will allow an in-depth understanding of the communication practices prevailing within biomedical journals.
- Quality assurance will be employed throughout data collection and analysis to ensure traceability and verification.
- Journal editors of a selection of biomedical journals will be interviewed; therefore, research findings cannot directly be extrapolated to all biomedical journals and other scientific fields.

## Introduction

Most journals in the biomedical field implement a pre-publication process which primarily involves the interaction of three key stakeholders around an academic research manuscript: journal editors, peer reviewers and authors. This process, typically referred to as ‘peer review’, is strongly embedded in the field of biomedical publishing and in its broadest sense refers to the evaluation of manuscripts submitted for publication by researchers from the same or related areas of expertise. Thus far, there is no universal definition of ‘peer review’, and its specific objectives are not clearly defined (1). Concurrently, the roles, tasks and core competencies expected of peer reviewers and editors have not been formally established and both groups operate largely without formal training (2,3). A study that aimed to identify all tasks that are expected of peer reviewers by journal editors when evaluating a manuscript reporting a randomized controlled trial (RCT) found that the most important tasks in peer review, as perceived by peer reviewers evaluating RCTs, were not congruent with the tasks most often requested by journal editors in their guidelines to reviewers (4). These differences illustrate the need to clarify the roles and tasks of peer reviewers.

The peer review process has at times been criticised for being ‘unscientific’ (5,6). Despite dealing with scientific output that potentially leads to changes in clinical practice, the process itself is not without potential biases - including prestige or association bias, gender bias, confirmation bias, conservatism, bias against interdisciplinary research, publication bias, language bias, and conflict of interest (7,8).

In light of this criticism, there have been several attempts to improve the peer review process and the quality of peer reviewer reports in the biomedical field (9). A recent systematic review evaluating the impact of interventions to improve the quality of peer review for biomedical publications (10) identified 25 strategies that have been implemented, including training interventions; use of checklists (such as Consort (11)); addition of specific experts (i.e. statistical peer reviewers); the introduction of open peer review (i.e., peer reviewers informed that their identity would be revealed) or blinded peer review (i.e., peer reviewers blinded to author names and affiliation); and interventions to increase the speed of the peer review process. The authors of the systematic review refrain from providing recommendations regarding the wider

1  
2  
3 implementation of the identified interventions due to concerns about their methodological quality,  
4 small sample size and applicability. Other researchers have argued that most of the approaches  
5 outlined above fail to compensate for potential biases, and point out that any success so far has  
6 been limited (12).

7  
8 Researchers have argued that limited success of interventions might be due to the underlying  
9 nature of peer review, which has been described as an intellectual process that encompasses  
10 objective and subjective elements (13). Editors and peer reviewers bring a diverse mix of skills,  
11 preferences, and intellectual idiosyncrasies to the task (14). At times, these may result in subjective  
12 judgements of manuscript quality. Peer review has also been described as an “inherently human  
13 phenomenon” that is underpinned by social dimensions (15,16). A qualitative study of the social  
14 and subjective dimensions of manuscript peer review in biomedical publishing concluded that  
15 biomedical manuscript review *“is a highly social and subjective process driven by communal as  
16 well as scientific goals, and influenced by reviewers’ and editors’ sense of their own authority,  
17 power, and moral responsibility, as well as by unavoidable prejudice and intuition.”* (17).  
18  
19  
20  
21  
22

23 Our broader research framework aims to generate an understanding of the communication  
24 practices within the editorial and manuscript peer review process in biomedical research.  
25 Disentangling current communication practices for a range of biomedical journals, and outlining  
26 the specific roles and tasks of the main actors might be a first step towards establishing the design  
27 of interventions that counterbalance social influences on the peer review process. In this study, we  
28 aim to identify and characterize the roles and tasks of the different actors in the process of peer  
29 review from the perspective of journal editors.  
30  
31  
32

33 Our specific objectives are:

- 34 1) To examine biomedical editors’ experiences of their interactions with peer reviewers and  
35 authors
- 36 2) To characterize journal editors’ perspectives, expectations, understandings and perceptions  
37 regarding the roles and tasks of peer reviewers  
38  
39  
40  
41

## 42 **Methods and analysis**

### 43 **Qualitative approach and research paradigm**

44 Given its underlying social and subjective dimensions (17,18), the need for more qualitative  
45 research into the peer review process within the biomedical field has been recognized for some  
46 time (1). However, to date, most such research has been overwhelmingly quantitative in nature  
47 (19).  
48  
49  
50

51 Drawing on a pragmatist epistemological position that the aim of inquiry cannot be independent  
52 from human experience (20), we considered a qualitative approach to be best suited to answer our  
53 research question. The expectations, understandings, perceptions and thoughts of journal editors  
54  
55  
56  
57

are largely intangible aspects that cannot be unpacked using predefined categories or viewed independently from the purposes of the peer review process itself.

The use of qualitative interviews will enable participants to speak freely and at length about such aspects, thus providing rich data embedded in personal experiences and practices.

Data will be analysed using thematic analysis as described by Braun and Clarke primarily because of the method's flexibility and epistemological assumptions, that are compatible with a pragmatist approach (21).

Study participants will be offered the possibility of conducting the interview either face-to-face or by phone/conferencing system, according to personal preference and availability. This will also enable the interviewing of people in geographically distant locations.

### Study sample and recruitment

We will use maximum variation purposive sampling to recruit a heterogeneous study sample of biomedical journal editors, allowing us to select editors with different characteristics that we anticipate may influence their perspectives. This sampling method enables conceptual exploration using the characteristics of individuals and journals as the basis of selection in order to reflect the diversity and breadth of the sample population, rather than achieving population representativeness (22).

Participants will be recruited through different sources. The study recruitment pathway is shown in Table 1.

**Table 1.** Study recruitment pathways

| Source of participants                                           | Sampling              |
|------------------------------------------------------------------|-----------------------|
| Existing professional networks                                   | Purposive/Snowballing |
| Two research publishers                                          | Purposive/Snowballing |
| International Congress on Peer Review and Scientific Publication | Purposive/Snowballing |
| Editor Associations                                              | Purposive/Snowballing |

Initially, interviewees will be drawn from a professional network of contacts (members of the Methods in Research on Research (MiRoR) project (23)) who are journal editors. Four editors will be interviewed for piloting purposes and requested to recommend additional journal editors whom the lead investigator can interview.

The research publishers BMC (part of Springer Nature) and BMJ are partners of the MiRoR project.

This partnership will be used to recruit interviewees. Editors-in chief operating within the BMJ Publishing Group will be contacted by the lead researcher (KG) via email, provided with study details, and asked to either participate themselves or recommend suitable journal editors who can be contacted instead. One follow-up email will be sent after two weeks to non-respondents.

Due to a different standard operating procedure a different recruitment strategy will be employed at BMC. The publishers' communication manager will communicate with all editors via internal mail, introduce the lead researcher and the research, and encourage them to respond if interested in participating.

Concurrently, the conference participation lists from the Eighth International Congress on Peer Review and Scientific Publication (24) will be reviewed and potential interviewees will be contacted via email by the lead researcher. One follow-up email will be sent to non-respondents after two weeks.

In addition, Editor Associations (Table 2) may be contacted to recruit further study participants in order to obtain maximum variability of editors' characteristics.

**Table 2** – List of Editors Associations

|                                                              |
|--------------------------------------------------------------|
| Asia Pacific Association of Medical Journal Editors (APAME)  |
| Council of Science Editors (CSE)                             |
| European Association of Science Editors (EASE)               |
| Eastern Mediterranean Association of Medical Editors (EMAME) |
| Forum for African Medical Editors (FAME)                     |
| International Committee of Medical Journal Editors (ICMJE)   |
| Japanese Association of Medical Journal Editors (JAMJE)      |
| Korean Association of Medical Journal Editors (KAMJE)        |
| Philippine Association of Medical Journal Editors (PAMJE)    |
| World Association of Medical Editors (WAME)                  |

Following the maximum variation sampling strategy, journal editors who agree to be interviewed will be categorized using the characteristics presented in Table 3, some of which have been shown to influence the peer review process (e.g. gender) (25).

This step will help to determine the characteristics that are under-represented, and inform the sampling strategy for identification of further participants in such a way as to maximize the diversity of interviewees.

**Table 3** – Sample characteristics

| Criteria                    | Characteristics                                                                            |
|-----------------------------|--------------------------------------------------------------------------------------------|
| Demographic characteristics | <ul style="list-style-type: none"> <li>• Gender</li> <li>• Editorial experience</li> </ul> |

|                         |                                                                                                                                                                                                                                                                                                                                                                                                                                     |
|-------------------------|-------------------------------------------------------------------------------------------------------------------------------------------------------------------------------------------------------------------------------------------------------------------------------------------------------------------------------------------------------------------------------------------------------------------------------------|
|                         | <ul style="list-style-type: none"> <li>• Editors' geographic location</li> </ul>                                                                                                                                                                                                                                                                                                                                                    |
| Journal characteristics | <ul style="list-style-type: none"> <li>• Journal specialty (e.g. Clinical, Public Health)</li> <li>• Impact factor (journals with or without impact factor)</li> <li>• Peer review practices (closed peer review, open peer review, post-publication peer review)</li> <li>• Publisher (medical publishing companies, independent publisher/university)</li> <li>• Open access, paywall</li> <li>• Size (editorial team)</li> </ul> |

Lastly, the journal editor identification process will be supplemented through snowball sampling (26). At the end of each interview, interviewees will be asked to recommend other editors whose experiences might be relevant to the study and who would potentially be interested in contributing to this study. These steps are expected to lead to recommendations that optimize sample variation.

### Saturation

Saturation is a core guiding principle to determine sample sizes in qualitative research, yet few qualitative studies report in detail on the parameters that influenced saturation in their studies (27). In this study we will adopt the seven parameters outlined by Hennink et al. that influence saturation (28) to establish our sample size determinants and demonstrate the grounds upon which saturation will be assessed and achieved, thereby justifying the final sample size. The parameters of saturation and sample size for our study are outlined in Table 4. According to Hennink et al. the sample size is determined by the combined influence of all parameters rather than any single parameter alone. In our case some parameters indicate a smaller sample for saturation and others suggest a larger sample, suggesting the need for an intermediate sample size.

The first parameter is the *purpose* of the study, which in this case is to capture themes from the data using the thematic analysis method. The second parameter is *population*. For the purposes of our study we want to grasp as wide a variety of biomedical editors as possible and will thus obtain a heterogeneous sample. This parameter will be satisfied by interviewing journal editors with different characteristics (i.e. demographic characteristics, journal specialty and journal characteristics). Our *data collection strategy* will be iterative, involving continual data collection until saturation is reached. We aim to collect *thick data* in order to provide deep and rich insights and capture explicit and concrete codes as well as conceptual codes that capture subtle issues. Our *codebook will be emerging including* a broad range of codes, including explicit, subtle, and conceptual codes.



Lastly, the *saturation goal and focus* of our study is to achieve data saturation i.e. the point where no new issues or themes are identified from the data (28).

Although the process of reaching saturation cannot be quantified in advance and involves an iterative approach until saturation is obtained, we used a recently developed quantitative method to offer an initial estimate of expected number of participants in our study. Following the approach suggested by Fugard and Potts (29) of estimating sample size required to achieve code saturation for studies that use thematic analysis, we calculated that we would need a sample size of at least 38 participants to detect, with 90% power, two instances of a theme with 10% prevalence. Appendix 1 shows the details of the calculation. This is in line with our previously hypothesized number of participants. Therefore, whilst our core approach to data collection strategy will be iterative, involving continual data collection until saturation is reached, we anticipate around 40 participants to be sufficient to provide us with meaningful information to answer our research questions, in line with similar studies (17).

**Table 4** – Parameters of saturation and determinants of sample size for our study

| Parameters                | Sample size determinant for each parameter | Determinant definition                                                                                                                        |
|---------------------------|--------------------------------------------|-----------------------------------------------------------------------------------------------------------------------------------------------|
| Purpose                   | Capture themes                             | The thematic analysis method will be used to identify themes and patterns of meanings across the dataset in relation to the research question |
| Population                | Heterogeneous                              | Journal editors with different characteristics (i.e. demographic characteristics, journal discipline and characteristics)                     |
| Sampling strategy         | Iterative sample                           | Purposive sampling using established networks; enlarged through snowballing                                                                   |
| Data quality              | Thick data                                 | Experiences and opinions will be captured with the aim to provide deep and rich insights                                                      |
| Type of codes             | Conceptual codes                           | Explicit and subtle                                                                                                                           |
| Codebook                  | Emerging codebook                          | Inductive coding derived from data content including broad range of codes                                                                     |
| Saturation goal and focus | Data saturation                            | Referring to saturation as the point where no new issues or themes are identified from the data                                               |

### Inclusion criteria and recruitment process

Study participants will consist of journal editors of biomedical journals, referring to individuals who are currently involved in the communication process between authors and peer reviewers

and/or be in a position to decide about the fate of manuscripts. They might also, but not necessarily, contribute to the determination of journal content and policy.

Journal editors will be contacted between October 2017 and February 2018. They will be sent an invitation email and information sheet by the lead author (KG), followed by a phone call to determine if they are interested in participating in the study. Written informed consent will be obtained from all participants prior to conducting the interviews.

### Interview guide

A preliminary topic guide for the semi-structured interviews (see Table 5) has been developed, informed by the outcomes of a previously conducted scoping review of the literature (30). The topic guide was piloted on four editors to assess usefulness and meaningfulness of the questions, the ease of administration, language and length, and to refine the topic guide. It is likely that the topic guide will be refined further after conducting more interviews.

**Table 5** – Draft topic guide for semi-structured interviews

| Key area of investigation                | Topics                                                                                                                                                     | Questions and prompts                                                                                                                                                                                                                                                                                                                                                                                                                                                                                                                                                                                                                                                                                                 |
|------------------------------------------|------------------------------------------------------------------------------------------------------------------------------------------------------------|-----------------------------------------------------------------------------------------------------------------------------------------------------------------------------------------------------------------------------------------------------------------------------------------------------------------------------------------------------------------------------------------------------------------------------------------------------------------------------------------------------------------------------------------------------------------------------------------------------------------------------------------------------------------------------------------------------------------------|
| Background information                   | <ul style="list-style-type: none"> <li>- Explore personal background</li> <li>- Level of experience</li> <li>- Own roles and tasks as an editor</li> </ul> | <ul style="list-style-type: none"> <li>• Tell me about your journal and the job you have.</li> <li>• How long have you been in this position?</li> </ul> <p><b>Prompt:</b> percentage of time devoted to editorial duties (e.g., part time, full time)</p> <ul style="list-style-type: none"> <li>• What are your current responsibilities?</li> <li>• Did you hold any other positions in the same field before your current position? If yes, what were your responsibilities then?</li> </ul>                                                                                                                                                                                                                      |
| Journal set-up                           | <ul style="list-style-type: none"> <li>- Explore journal set-up</li> </ul>                                                                                 | <ul style="list-style-type: none"> <li>• Tell me about your journal - how does it work?</li> </ul> <p>Prompt: availability of editorial support staff</p> <ul style="list-style-type: none"> <li>• How does the peer review process work in your journal?</li> <li>• What do you do within the process?</li> </ul>                                                                                                                                                                                                                                                                                                                                                                                                    |
| Opinion on peer reviewers role and tasks | <ul style="list-style-type: none"> <li>- Roles and tasks of peer reviewers</li> <li>- Expectations</li> </ul>                                              | <ul style="list-style-type: none"> <li>• What do you expect from peer reviewers in terms of their roles and tasks?</li> <li>• How do you let your reviewers know what you expect from them?</li> </ul> <p><b>Prompt</b> on whatever has not been mentioned:</p> <ul style="list-style-type: none"> <li>• Attitudes and beliefs (about role and tasks)</li> <li>• Organisational expectations (about role and tasks)</li> </ul> <ul style="list-style-type: none"> <li>• Can you tell me about a specific situation when you were not satisfied with a review or with a peer reviewer?</li> <li>• What did you do in that a situation?</li> </ul> <p><b>Prompt:</b> looks for factors other than being late with a</p> |

1  
2  
3  
4  
5  
6  
7  
8  
9  
10  
11  
12  
13  
14  
15  
16  
17  
18  
19  
20  
21  
22  
23  
24  
25  
26  
27  
28  
29  
30  
31  
32  
33  
34  
35  
36  
37  
38  
39  
40  
41  
42  
43  
44  
45  
46  
47  
48  
49  
50  
51  
52  
53  
54  
55  
56  
57  
58  
59  
60

|                                                           |                                                                                                                                             |                                                                                                                                                                                                                                                                                                                                                                                                                                                                                                                                                                                                                                                                                                                                                                                   |
|-----------------------------------------------------------|---------------------------------------------------------------------------------------------------------------------------------------------|-----------------------------------------------------------------------------------------------------------------------------------------------------------------------------------------------------------------------------------------------------------------------------------------------------------------------------------------------------------------------------------------------------------------------------------------------------------------------------------------------------------------------------------------------------------------------------------------------------------------------------------------------------------------------------------------------------------------------------------------------------------------------------------|
|                                                           |                                                                                                                                             | <p>review, or not doing a review once you they have accepted it</p> <ul style="list-style-type: none"> <li>• Can you tell me about a situation when you were exceptionally satisfied with a review or with a peer reviewer?</li> <li>• Were there situations (in regards to the roles and task of reviewers) when you disagreed with the other editors you work with? What about? What happened?</li> <li>• What about other journals, do roles and tasks differ among journals in your field?</li> </ul> <p><b>Prompt:</b> If yes (i.e. differences exist), then:</p> <ul style="list-style-type: none"> <li>• How does this affect the process?</li> <li>• How does it affect your communication?</li> <li>• How do you negotiate those differences? Does it matter?</li> </ul> |
| Communication between editors, peer reviewers and authors | <ul style="list-style-type: none"> <li>- Communication between the three parties</li> <li>- Potential conflicts</li> <li>- Power</li> </ul> | <ul style="list-style-type: none"> <li>• Can you describe your experience of the communication process between editors, authors and peer reviews?</li> <li>• How do you communicate with authors and peer reviewers?</li> <li>• Can you give me some specific examples of situations where this communication is challenging?</li> </ul> <p><b>Prompt:</b><br/>What are potential conflicts?<br/>When do disagreements arise?<br/>What happens if there is disagreement between peer reviewers?</p>                                                                                                                                                                                                                                                                               |
| Conclusion                                                | <ul style="list-style-type: none"> <li>- Snowballing</li> <li>- Documents</li> <li>- Final comments</li> </ul>                              | <ul style="list-style-type: none"> <li>• Is there anybody else whom you think I should speak to?</li> <li>• Any articles/documents I can access/should look at?</li> <li>• Any final comments? Is there anything else that you think is important to mention?</li> </ul>                                                                                                                                                                                                                                                                                                                                                                                                                                                                                                          |

### Data collection and recording

All interviews will be conducted by the principal researcher (KG) either face-to-face or by phone or online call (e.g. Skype or conferencing system), according to the circumstances and preferences of the interviewees.

With the permission of the participants, interviews will be audio-recorded and notes will be taken. Interviewees will be asked if they could be contacted again if further clarification is needed.

Based on the pilot interviews it is anticipated that interviews will take around 30 minutes to complete.

### Data analysis

Data will be analysed using Braun and Clarke's six phase thematic analysis (TA) described as "a method for identifying, analysing and reporting patterns (themes) within data" (21). This analytic

1  
2  
3 framework assumes that truth can be accessed through language, but that accounts and experiences  
4 are socially mediated (31).

5  
6 It is not bound to any pre-existing theoretical framework, therefore it offers relative theoretical  
7 independence and compatibility with various approaches which is compatible with pragmatist  
8 position that we subscribe to (32). TA has also been described as a more accessible form of  
9 analysis compared to other approaches that requires less detailed theoretical and technical  
10 knowledge, and is therefore particularly suitable for the lead researcher (KG) of this study who is  
11 at an early stage of her qualitative research experience (21). The principal researcher (KG) will  
12 conduct all interviews, which will be transcribed verbatim.

13  
14 Data analysis will take place concurrently with data collection in an iterative cycle. This serves  
15 two purposes; firstly, it will help to further refine the topic guide, and allow the interviewer (KG)  
16 to reflect with the senior investigator (DH) on her own interviewing technique and style for  
17 subsequent interviews. Secondly, it will help the researchers to determine when saturation occurs.  
18 The six phases of TA analysis consist of: familiarizing with the data, generating initial codes,  
19 searching for themes, reviewing themes, defining and naming themes, producing the report.

20  
21  
22  
23  
24 The first phase will start by familiarizing with the data - re-reading each transcript at least twice  
25 and noting down initial ideas.

26  
27 In the second phase initial codes will be generated from the subset of interviews using the  
28 inductive approach. The codes will be developed line-by-line from the interview content, focusing  
29 on the identification of both semantic (i.e. reflecting the explicit content) and latent (i.e. reflect the  
30 implicit content) features (21). In order to ensure consistency a code manual will be developed.  
31 These codes will be then applied to subsequent interviews with sensitivity to the possibility of new  
32 emerging codes that will be added to the code manual and applied to the entire dataset in an  
33 iterative manner. All coding will be performed by both researchers KG and DH to increase  
34 credibility of the analysis. The qualitative data analysis software NVivo v.11 will be used to aid  
35 data management and analysis (i.e. indexing of coding and transcripts).

36  
37  
38 In the third phase the codes will be clustered into potential themes to give an indication of their  
39 prevalence for the assessment of (code or meaning) saturation, and into a preliminary thematic  
40 map displaying the main themes.

41  
42 The fourth phase will consist of reviewing themes and will be divided into two stages; the  
43 reviewing and refining of the data at the level of the coded data extracts, and subsequently at the  
44 level of the entire data set. These two stages will lead to the generation of a thematic map of the  
45 analysis.

46  
47 The aim of the next phase will be to definitively define the scope and content of each relevant  
48 theme and precisely name them. This will involve debriefing between the study team. Debriefing  
49 with an outside expert (on peer review in biomedical journals) as suggested by King (33) will be  
50 conducted to ensure that themes are sufficiently clear to someone outside of the immediate  
51 research team.

1  
2  
3 After the establishment of the final themes, the last phase will consist of writing up the study  
4 findings as a journal article. Direct quotes will be used to illustrate specific points of interpretation  
5 and the extraction of themes. All themes and subthemes will be presented in the result section and  
6 discussed in the light of existing literature.  
7  
8  
9

### 10 11 **Securing study quality**

12 The most widely used criteria for evaluating qualitative analysis are those developed by Lincoln  
13 and Guba (34), who introduced the concept of ‘trustworthiness’ to parallel the conventional  
14 quantitative assessment criteria of validity and reliability. Trustworthiness is determined by  
15 applying the concepts of credibility, transferability, dependability and conformability to qualitative  
16 research. Credibility corresponds to the concept of validity, whereby researchers seek to ensure  
17 that a study  
18

19 measures what it is actually intended to measure. Transferability corresponds to external validity,  
20 or the extent to which the research can be transferred to other contexts. Dependability corresponds  
21 with reliability, or whether the research process is methodologically consistent and correct,  
22 whether the research questions are clear and logically connected to the research purpose and  
23 design, and whether findings are consistent and repeatable. Confirmability is concerned with  
24 establishing that the researcher’s interpretations and findings are clearly derived from the data,  
25 requiring the researcher to demonstrate how conclusions and interpretations have been reached  
26 (Tobin & Begley, 2004).  
27

28 In order to establish trustworthiness in this research, the step-by-step approach proposed by  
29 Nowell et al. – which provides a detailed description of how to conduct a trustworthy TA – will  
30 be followed (35). These authors use the criteria by Lincoln and Guba and show how these can be  
31 achieved throughout the 6 phases of TA.  
32

33 We will use reporting guidelines for reporting qualitative research to provide detailed reporting of  
34 methods used (36).  
35  
36  
37  
38  
39

### 40 **Patient and Public Involvement**

41 There was no patient or public involvement in this research project.  
42  
43

### 44 **Discussion**

45 This research has multiple potential uses. As a standalone research piece it will generate context-  
46 based information from journal editors’ perspectives that will help to provide insight into the  
47 communication patterns within biomedical journals, including differences and similarities across  
48 biomedical journals. It is also embedded within a larger project that will inform the analysis of  
49 peer reviewer reports.  
50

51 The study findings can further be used to inform biomedical journal policies and develop training  
52 courses for peer reviewers and journal editors.  
53  
54  
55  
56  
57

### Ethics and dissemination

This project has been evaluated and approved by the University of Split, Medical School Ethics Committee (2181-198-03-04-17-0029) in May 2017.

Interviewees will receive an information sheet about the research and a consent form before the interview. The information letter includes details on the maintenance of anonymity and confidentiality throughout the research process. Prior to the interview, information from the information sheet and consent form will be reiterated verbally, and interviewees will be asked to consent to participation and recording of their interviews. Participants will be able to choose not to be directly quoted in any publications resulting from the study.

Findings will be disseminated through a publication in a peer-reviewed journal and presentations at academic conferences and other meetings.

### Acknowledgements

The authors would like to thank Professor Erik Cobo for providing advice during the writing of this protocol and Dr Sara Schroter (BMJ) and Dr Elizabeth Moylan (BMC) for providing guidance and help on the recruitment strategy of interviewees.

**Contributors** All authors have made substantive intellectual contributions to the development of this protocol. KG conceptualized the study approach and led the writing of the manuscript. DH led the supervision of the manuscript preparation. DH was involved in developing the study questions and design and provided detailed comments on earlier drafts.

**Funding** This project was supported by the European Union's Horizon 2020 research and innovation programme under the Marie Skłodowska-Curie grant agreement No 676207. The funders had no role in the study design, data collection and analysis, decision to publish, or preparation of the manuscripts.

**Competing interests** At the time of the submission of this protocol KG conducted a secondment at the BMJ.

## References

1. Overbeke J, Wager E. 3: The state of evidence: what we know and what we don't know about journal peer review. *JAMA*. 1994;272:79–174.
2. Galipeau J, Barbour V, Baskin P, Bell-Syer S, Cobey K, Cumpston M, et al. A scoping review of competencies for scientific editors of biomedical journals. *BMC Med*. 2016 Feb 2;14:1–17.
3. Moher D, Galipeau J, Alam S, Barbour V, Bartolomeos K, Baskin P, et al. Core competencies for scientific editors of biomedical journals: consensus statement. *BMC Med*. 2017 Sep 11;15(1):167.
4. Chauvin A, Ravaud P, Baron G, Barnes C, Boutron I. The most important tasks for peer reviewers evaluating a randomized controlled trial are not congruent with the tasks most often requested by journal editors. *BMC Med*. 2015;13(1):1.
5. Smith R. Peer review: a flawed process at the heart of science and journals. *J R Soc Med* [Internet]. 2006;99. Available from: <http://dx.doi.org/10.1258/jrsm.99.4.178>
6. Rennie D. Make peer review scientific. *Nature*. 2016;535(7610):31–3.
7. Silva PUKD, Vance CK. Preserving the Quality of Scientific Research: Peer Review of Research Articles. In: *Scientific Scholarly Communication* [Internet]. Springer International Publishing; 2017 [cited 2017 Apr 18]. p. 73–99. (Fascinating Life Sciences). Available from: [http://link.springer.com/chapter/10.1007/978-3-319-50627-2\\_6](http://link.springer.com/chapter/10.1007/978-3-319-50627-2_6)
8. Lee CJ, Sugimoto CR, Zhang G, Cronin B. Bias in peer review. *J Am Soc Inf Sci Technol*. 2013 Jan 1;64(1):2–17.
9. Jefferson T, Rudin M, Brodney Folse S. Editorial peer review for improving the quality of reports of biomedical studies. *Cochrane Database Syst Rev*. 2007;2.
10. Bruce R, Chauvin A, Trinquart L, Ravaud P, Boutron I. Impact of interventions to improve the quality of peer review of biomedical journals: a systematic review and meta-analysis. *BMC Med*. 2016;14(1):85.
11. Altman DG, Schulz KF, Moher D. The revised CONSORT statement for reporting randomized trials: explanation and elaboration. *Ann Intern Med* [Internet]. 2001;134. Available from: <http://dx.doi.org/10.7326/0003-4819-134-8-200104170-00012>
12. Hojat M, Gonnella JS, Caelleigh AS. Impartial judgment by the “gatekeepers” of science: fallibility and accountability in the peer review process. *Adv Health Sci Educ Theory Pract*. 2003;8(1):75–96.
13. Kassirer JP, Champion EW. Peer review: crude and understudied, but indispensable. *Jama*. 1994;272(2):96–7.
14. King CR, McGuire DB, Longman AJ, Carroll-Johnson RM. Peer review, authorship, ethics, and conflict of interest. *Image J Nurs Sch*. 1997 May;29(2):163–7.

15. Horn SA. The Social and Psychological Costs of Peer Review: Stress and Coping With Manuscript Rejection. *J Manag Inq*. 2016 Jan 1;25(1):11–26.
16. Bedeian AG. Peer Review and the Social Construction of Knowledge in the Management Discipline. *Acad Manag Learn Educ*. 2004 Jun 1;3(2):198–216.
17. Lipworth WL, Kerridge IH, Carter SM, Little M. Journal peer review in context: A qualitative study of the social and subjective dimensions of manuscript review in biomedical publishing. *Soc Sci Med*. 2011 Apr;72(7):1056–63.
18. Lipworth W, Kerridge I. Shifting Power Relations and the Ethics of Journal Peer Review. *Soc Epistemol*. 2011 Jan 1;25(1):97–121.
19. Shashok K. Standardization vs Diversity: How Can We Push Peer Review Research Forward? *Medscape Gen Med*. 2005 Feb 16;7(1):11.
20. Yardley L, Bishop F. Mixing Qualitative and Quantitative Methods: A Pragmatic Approach. In: Willig C, Stainton-Rogers W, editors. *Qualitative Research in Psychology*. Thousand Oaks (CA): SAGE Publication Ltd.; p. 352–69.
21. Braun V, Clarke V. Using thematic analysis in psychology. *Qual Res Psychol*. 2006;3(2):77–101.
22. Patton M. *Qualitative Research and Evaluation Methods*, 209-339. 2002;
23. Projet MiRoR | An innovative and ambitious joint doctoral training programme [Internet]. [cited 2017 May 2]. Available from: <http://mirror-ejd.eu/>
24. Rennie D, Flanagan A, Godlee F, Bloom T. The Eighth International Congress on Peer Review and Biomedical Publication: A Call for Research. *JAMA*. 2015 May 26;313(20):2031–2.
25. Fox CW, Burns CS, Meyer JA. Editor and reviewer gender influence the peer review process but not peer review outcomes at an ecology journal. *Funct Ecol*. 2016;30(1):140–53.
26. Morgan DL. Sample size. *Sage Encycl Qual Res Methods*. 2008;798.
27. Marshall B, Cardon P, Poddar A, Fontenot R. Does Sample Size Matter in Qualitative Research?: A Review of Qualitative Interviews in is Research. *J Comput Inf Syst*. 2013 Sep 1;54(1):11–22.
28. Hennink MM, Kaiser BN, Marconi VC. Code Saturation Versus Meaning Saturation: How Many Interviews Are Enough? *Qual Health Res*. 2016;1049732316665344.
29. Fugard AJB, Potts HWW. Supporting thinking on sample sizes for thematic analyses: a quantitative tool. *Int J Soc Res Methodol*. 2015 Nov 2;18(6):669–84.



- 1  
2  
3 30. Glonti K, Cauchi D, Cobo E, Boutron I, Moher D, Hren D. A scoping review protocol on the  
4 roles and tasks of peer reviewers in the manuscript review process in biomedical journals.  
5 BMJ Open. 2017 Oct 1;7(10):e017468.  
6  
7  
8 31. Madill A, Jordan A, Shirley C. Objectivity and reliability in qualitative analysis: realist,  
9 contextualist and radical constructionist epistemologies. Br J Psychol Lond Engl 1953. 2000  
10 Feb;91 ( Pt 1):1–20.  
11  
12 32. Creswell JW, Poth CN. Qualitative inquiry and research design: Choosing among five  
13 approaches. Sage publications; 2017.  
14  
15 33. King N. Using templates in the thematic analysis of text. Essent Guide Qual Methods Organ  
16 Res. 2004;2:256–70.  
17  
18 34. Lincoln Y, Guba E. Naturalistic inquiry. Newbury Park. 1985;  
19  
20 35. Nowell LS, Norris JM, White DE, Moules NJ. Thematic Analysis: Striving to Meet the  
21 Trustworthiness Criteria. Int J Qual Methods. 2017;16(1):1609406917733847.  
22  
23  
24 36. Tong A, Sainsbury P, Craig J. Consolidated criteria for reporting qualitative research  
25 (COREQ): a 32-item checklist for interviews and focus groups. Int J Qual Health Care. 2007  
26 Dec 1;19(6):349–57.  
27  
28  
29  
30  
31  
32  
33  
34  
35  
36  
37  
38  
39  
40  
41  
42  
43  
44  
45  
46  
47  
48  
49  
50  
51  
52  
53  
54  
55  
56  
57  
58  
59  
60

1  
2  
3 Appendix 1. Sample size calculation  
4  
5

```
6 sampSizeForQual = function(Power, ThemePrevalence, NumInstances) { qnbinom(Power, size =  
7 NumInstances, prob = ThemePrevalence) + NumInstances  
8
```

```
9 }  
10
```

```
11 sampSizeForQual(0.9, 0.1, 2)  
12
```

```
13 [1] 38  
14  
15
```

```
16  
17 Code run via R-Fiddle (http://www.r-fiddle.org)  
18  
19  
20  
21  
22  
23  
24  
25  
26  
27  
28  
29  
30  
31  
32  
33  
34  
35  
36  
37  
38  
39  
40  
41  
42  
43  
44  
45  
46  
47  
48  
49  
50  
51  
52  
53  
54  
55  
56  
57  
58  
59  
60
```

# BMJ Open

## The editors' perspectives on the peer review process in biomedical journals: Protocol for a qualitative study

|                                 |                                                                                                                                                                                                                                                                                                                                                                                |
|---------------------------------|--------------------------------------------------------------------------------------------------------------------------------------------------------------------------------------------------------------------------------------------------------------------------------------------------------------------------------------------------------------------------------|
| Journal:                        | <i>BMJ Open</i>                                                                                                                                                                                                                                                                                                                                                                |
| Manuscript ID                   | bmjopen-2017-020568.R2                                                                                                                                                                                                                                                                                                                                                         |
| Article Type:                   | Protocol                                                                                                                                                                                                                                                                                                                                                                       |
| Date Submitted by the Author:   | 12-Jul-2018                                                                                                                                                                                                                                                                                                                                                                    |
| Complete List of Authors:       | Glonti, Ketevan; Sveuciliste u Splitu, School of Humanities and Social Sciences; Paris Descartes University, Sorbonne Paris Cité, INSERM, U1153 Epidemiology and Biostatistics Sorbonne Paris Cité Research Center (CRESS), Methods of therapeutic evaluation of chronic diseases Team (METHODS)<br>Hren, Darko; University of Split, School of Humanities and Social Sciences |
| <b>Primary Subject Heading</b>: | Medical publishing and peer review                                                                                                                                                                                                                                                                                                                                             |
| Secondary Subject Heading:      | Qualitative research                                                                                                                                                                                                                                                                                                                                                           |
| Keywords:                       | peer review, QUALITATIVE RESEARCH, scientific publishing                                                                                                                                                                                                                                                                                                                       |
|                                 |                                                                                                                                                                                                                                                                                                                                                                                |

SCHOLARONE™  
Manuscripts

# The editors' perspectives on the peer review process in biomedical journals: Protocol for a qualitative study

**Authors:** Ketevan Glonti<sup>1,2</sup>, Darko Hren<sup>1</sup>

<sup>1</sup> University of Split, School of Humanities and Social Sciences, Split, Croatia. [kglonti@unist.hr](mailto:kglonti@unist.hr), [dhren@unist.hr](mailto:dhren@unist.hr)

<sup>2</sup> INSERM, U1153 Epidemiology and Biostatistics Sorbonne Paris Cité Research Center (CRESS), Methods of therapeutic evaluation of chronic diseases Team (METHODS), Paris, F-75014 France; Paris Descartes University, Sorbonne Paris Cité, France.

**Corresponding author:** Ketevan Glonti, Poljička 35, 21000 Split, Croatia, [kglonti@unist.hr](mailto:kglonti@unist.hr)  
**Tel:** +385 976324635

## Abstract

**Introduction:** Despite dealing with scientific output and potentially having an impact on the quality of research published, the manuscript peer review process itself has at times been criticised for being 'unscientific'. Research indicates that there are social and subjective dimensions of the peer review process that contribute to this perception, including how key stakeholders - namely authors, editors and peer reviewers - communicate. In particular, it has been suggested that the expected roles and tasks of stakeholders need to be more clearly defined and communicated if the manuscript review process is to be improved. Disentangling current communication practices, and outlining the specific roles and tasks of the main actors, might be a first step towards establishing the design of interventions that counterbalance social influences on the peer review process.

The purpose of this article is to present a methodological design for a qualitative study exploring the communication practices within the manuscript review process of biomedical journals from the journal editors' point of view.

**Methods and analysis:** Semi-structured interviews will be carried out with editors of biomedical journals between October 2017 and February 2018. A heterogeneous sample of participants representing a wide range of biomedical journals will be sought through purposive maximum variation sampling, drawing from a professional network of contacts, publishers, conference participants, and snowballing.

Interviews will be thematically analysed following the method outlined by Braun and Clarke. The qualitative data analysis software NVivo v11 will be used to aid data management and analysis.

**Ethics and dissemination:** This research project was evaluated and approved by the University of Split, Medical School Ethics Committee (2181-198-03-04-17-0029) in May 2017. Findings will be disseminated through a publication in a peer-reviewed journal and presentations during conferences.

**Keywords:** Peer review, Biomedical publishing, Scientific journal publishing, Qualitative research

## Strengths and limitations of this study

- Qualitative analysis of interview data from a wide range of editors of biomedical journals will allow an in-depth understanding of the communication practices prevailing within biomedical journals.
- Quality assurance will be employed throughout data collection and analysis to ensure traceability and verification.
- Journal editors of a selection of biomedical journals will be interviewed; therefore, research findings cannot directly be extrapolated to all biomedical journals and other scientific fields.

## Introduction

Most journals in the biomedical field implement a pre-publication process which primarily involves the interaction of three key stakeholders around an academic research manuscript: journal editors, peer reviewers and authors. This process, typically referred to as ‘peer review’, is strongly embedded in the field of biomedical publishing and in its broadest sense refers to the evaluation of manuscripts submitted for publication by researchers from the same or related areas of expertise. Thus far, there is no universal definition of ‘peer review’, and its specific objectives are not clearly defined (1). Concurrently, the roles, tasks and core competencies expected of peer reviewers and editors have not been formally established and both groups operate largely without formal training (2,3). A study that aimed to identify all tasks that are expected of peer reviewers by journal editors when evaluating a manuscript reporting a randomized controlled trial (RCT) found that the most important tasks in peer review, as perceived by peer reviewers evaluating RCTs, were not congruent with the tasks most often requested by journal editors in their guidelines to reviewers (4). These differences illustrate the need to clarify the roles and tasks of peer reviewers.

The peer review process has at times been criticised for being ‘unscientific’ (5,6). Despite dealing with scientific output that potentially leads to changes in clinical practice, the process itself is not without potential biases - including prestige or association bias, gender bias, confirmation bias, conservatism, bias against interdisciplinary research, publication bias, language bias, and conflict of interest (7,8).

In light of this criticism, there have been several attempts to improve the peer review process and the quality of peer reviewer reports in the biomedical field (9). A recent systematic review evaluating the impact of interventions to improve the quality of peer review for biomedical publications (10) identified 25 strategies that have been implemented, including training interventions; use of checklists (such as Consort (11)); addition of specific experts (i.e. statistical peer reviewers); the introduction of open peer review (i.e., peer reviewers informed that their identity would be revealed) or blinded peer review (i.e., peer reviewers blinded to author names and affiliation); and interventions to increase the speed of the peer review process. The authors of the systematic review refrain from providing recommendations regarding the wider

1  
2  
3 implementation of the identified interventions due to concerns about their methodological quality,  
4 small sample size and applicability. Other researchers have argued that most of the approaches  
5 outlined above fail to compensate for potential biases, and point out that any success so far has  
6 been limited (12).

7  
8 Researchers have argued that limited success of interventions might be due to the underlying  
9 nature of peer review, which has been described as an intellectual process that encompasses  
10 objective and subjective elements (13). Editors and peer reviewers bring a diverse mix of skills,  
11 preferences, and intellectual idiosyncrasies to the task (14). At times, these may result in subjective  
12 judgements of manuscript quality. Peer review has also been described as an “inherently human  
13 phenomenon” that is underpinned by social dimensions (15,16). A qualitative study of the social  
14 and subjective dimensions of manuscript peer review in biomedical publishing concluded that  
15 biomedical manuscript review *“is a highly social and subjective process driven by communal as  
16 well as scientific goals, and influenced by reviewers’ and editors’ sense of their own authority,  
17 power, and moral responsibility, as well as by unavoidable prejudice and intuition.”* (17).  
18  
19  
20  
21  
22

23 Our broader research framework aims to generate an understanding of the communication  
24 practices within the editorial and manuscript peer review process in biomedical research.  
25 Disentangling current communication practices for a range of biomedical journals, and outlining  
26 the specific roles and tasks of the main actors might be a first step towards establishing the design  
27 of interventions that counterbalance social influences on the peer review process. In this study, we  
28 aim to identify and characterize the roles and tasks of the different actors in the process of peer  
29 review from the perspective of journal editors.  
30  
31  
32

33 Our specific objectives are:

- 34 1) To examine biomedical editors’ experiences of their interactions with peer reviewers and  
35 authors
- 36 2) To characterize journal editors’ perspectives, expectations, understandings and perceptions  
37 regarding the roles and tasks of peer reviewers  
38  
39  
40  
41

## 42 **Methods and analysis**

### 43 **Qualitative approach and research paradigm**

44 Given its underlying social and subjective dimensions (17,18), the need for more qualitative  
45 research into the peer review process within the biomedical field has been recognized for some  
46 time (1). However, to date, most such research has been overwhelmingly quantitative in nature  
47 (19).  
48  
49

50 Drawing on a pragmatist epistemological position that the aim of inquiry cannot be independent  
51 from human experience (20), we considered a qualitative approach to be best suited to answer our  
52 research question. The expectations, understandings, perceptions and thoughts of journal editors  
53 are largely intangible aspects that cannot be unpacked using predefined categories or viewed  
54 independently from the purposes of the peer review process itself.  
55  
56  
57

The use of qualitative interviews will enable participants to speak freely and at length about such aspects, thus providing rich data embedded in personal experiences and practices.

Data will be analysed using thematic analysis as described by Braun and Clarke primarily because of the method's flexibility and epistemological assumptions, that are compatible with a pragmatist approach (21).

Study participants will be offered the possibility of conducting the interview either face-to-face or by phone/conferencing system, according to personal preference and availability. This will also enable the interviewing of people in geographically distant locations.

### Study sample and recruitment

We will use maximum variation purposive sampling to recruit a heterogeneous study sample of biomedical journal editors, allowing us to select editors with different characteristics that we anticipate may influence their perspectives. This sampling method enables conceptual exploration using the characteristics of individuals and journals as the basis of selection in order to reflect the diversity and breadth of the sample population, rather than achieving population representativeness (22).

Participants will be recruited through different sources. The study recruitment pathway is shown in Table 1.

**Table 1.** Study recruitment pathways

| Source of participants                                           | Sampling              |
|------------------------------------------------------------------|-----------------------|
| Existing professional networks                                   | Purposive/Snowballing |
| Two research publishers                                          | Purposive/Snowballing |
| International Congress on Peer Review and Scientific Publication | Purposive/Snowballing |

Initially, interviewees will be drawn from a professional network of contacts (members of the Methods in Research on Research (MiRoR) project (23)) who are journal editors. Four editors will be interviewed for piloting purposes and requested to recommend additional journal editors whom the lead investigator can interview.

The research publishers BMC (part of Springer Nature) and BMJ are partners of the MiRoR project and this partnership will be used to recruit interviewees. Editors-in chief operating within the BMJ Publishing Group will be contacted by the lead researcher (KG) via email, provided with study details, and asked to either participate themselves or recommend suitable journal editors who can be contacted instead. One follow-up email will be sent after two weeks to non-respondents.

Due to a different standard operating procedure a different recruitment strategy will be employed at BMC. The publishers' communication manager will communicate with all editors via internal

mail, introduce the lead researcher and the research, and encourage them to respond if interested in participating.

Concurrently, the conference participation lists from the Eighth International Congress on Peer Review and Scientific Publication (24) will be reviewed and potential interviewees will be contacted via email by the lead researcher. One follow-up email will be sent to non-respondents after two weeks.

Following the maximum variation sampling strategy, journal editors who agree to be interviewed will be categorized using the characteristics presented in Table 2 some of which have been shown to influence the peer review process (e.g. gender) (25).

This step will help to determine the characteristics that are under-represented, and inform the sampling strategy for identification of further participants in such a way as to maximize the diversity of interviewees.

**Table 2** – Sample characteristics

| Criteria                    | Characteristics                                                                                                                                                                                                                                                                                                                                                                                                                     |
|-----------------------------|-------------------------------------------------------------------------------------------------------------------------------------------------------------------------------------------------------------------------------------------------------------------------------------------------------------------------------------------------------------------------------------------------------------------------------------|
| Demographic characteristics | <ul style="list-style-type: none"> <li>• Gender</li> <li>• Editorial experience</li> <li>• Editors' geographic location</li> </ul>                                                                                                                                                                                                                                                                                                  |
| Journal characteristics     | <ul style="list-style-type: none"> <li>• Journal specialty (e.g. Clinical, Public Health)</li> <li>• Impact factor (journals with or without impact factor)</li> <li>• Peer review practices (closed peer review, open peer review, post-publication peer review)</li> <li>• Publisher (medical publishing companies, independent publisher/university)</li> <li>• Open access, paywall</li> <li>• Size (editorial team)</li> </ul> |

Lastly, the journal editor identification process will be supplemented through snowball sampling (26). At the end of each interview, interviewees will be asked to recommend other editors whose experiences might be relevant to the study and who would potentially be interested in contributing to this study. These steps are expected to lead to recommendations that optimize sample variation.



## Saturation

Saturation is a core guiding principle to determine sample sizes in qualitative research, yet few qualitative studies report in detail on the parameters that influenced saturation in their studies (27). In this study we will adopt the seven parameters outlined by Hennink et al. that influence saturation (28) to establish our sample size determinants and demonstrate the grounds upon which saturation will be assessed and achieved, thereby justifying the final sample size. The parameters of saturation and sample size for our study are outlined in Table 3. According to Hennink et al. the sample size is determined by the combined influence of all parameters rather than any single parameter alone. In our case some parameters indicate a smaller sample for saturation and others suggest a larger sample, suggesting the need for an intermediate sample size.

The first parameter is the *purpose* of the study, which in this case is to capture themes from the data using the thematic analysis method. The second parameter is *population*. For the purposes of our study we want to grasp as wide variety of biomedical editors as possible and will thus obtain a heterogeneous sample. This parameter will be satisfied by interviewing journal editors with different characteristics (i.e. demographic characteristics, journal specialty and journal characteristics). Our *data collection strategy* will be iterative, involving continual data collection until a sample covering wide variety of experiences and viewpoints has been achieved. We aim to collect *thick data* in order to provide deep and rich insights and capture explicit and concrete codes as well as conceptual codes that capture subtle issues. Our *codebook will be emerging including* a broad range of codes, including explicit, subtle, and conceptual codes.

Lastly, the *saturation goal and focus* of our study is to achieve data saturation i.e. the point where no new issues or themes are identified from the data (28).

Although the process of reaching saturation cannot be meaningfully quantified in advance and involves an iterative approach until saturation is obtained, we used a recently developed quantitative method to offer an initial estimate of expected number of participants in our study. Following the approach suggested by Fugard and Potts (29) of estimating sample size required to achieve code saturation for studies that use thematic analysis, we calculated that we would need a sample size of at least 38 participants to detect, with 90% power, two instances of a theme with 10% prevalence. Appendix 1 shows the details of the calculation. This is in line with our previously hypothesized number of participants. Therefore, whilst our core approach to data collection strategy will be iterative, involving continual data collection until saturation is reached, we anticipate around 40 participants to be sufficient to provide us with meaningful information to answer our research questions, in line with similar studies (17).

**Table 3** – Parameters of saturation and determinants of sample size for our study

| Parameters | Sample size determinant for each parameter | Determinant definition                       |
|------------|--------------------------------------------|----------------------------------------------|
| Purpose    | Capture themes                             | The thematic analysis method will be used to |

|                           |                    |                                                                                                                           |
|---------------------------|--------------------|---------------------------------------------------------------------------------------------------------------------------|
|                           |                    | identify themes and patterns of meanings across the dataset in relation to the research question                          |
| Population                | Heterogeneous      | Journal editors with different characteristics (i.e. demographic characteristics, journal discipline and characteristics) |
| Sampling strategy         | Iterative sampling | Iterative sampling using established networks; enlarged through snowballing                                               |
| Data quality              | Thick data         | Experiences and opinions will be captured with the aim to provide deep and rich insights                                  |
| Type of codes             | Conceptual codes   | Explicit and subtle                                                                                                       |
| Codebook                  | Emerging codebook  | Inductive coding derived from data content including broad range of codes                                                 |
| Saturation goal and focus | Data saturation    | Referring to saturation as the point where no new issues or themes are identified from the data                           |

### Inclusion criteria and recruitment process

Study participants will consist of journal editors of biomedical journals, referring to individuals who are currently involved in the communication process between authors and peer reviewers and/or who are in a position to decide about the fate of manuscripts. They might also, but not necessarily, contribute to the determination of journal content and policy.

Journal editors will be contacted between October 2017 and February 2018. They will be sent an invitation email and information sheet by the lead author (KG), followed by a phone call to determine if they are interested in participating in the study. Written informed consent will be obtained from all participants prior to conducting the interviews.

### Interview guide

A preliminary topic guide for the semi-structured interviews (see Table 4) has been developed, informed by the outcomes of a previously conducted scoping review of the literature (30). The topic guide was piloted on four editors to assess usefulness and meaningfulness of the questions, the ease of administration, language and length, and to refine the topic guide. It is likely that the topic guide will be refined further after conducting more interviews.

**Table 4** – Draft topic guide for semi-structured interviews

| Key area of investigation | Topics | Questions and prompts |
|---------------------------|--------|-----------------------|
|---------------------------|--------|-----------------------|

|                                                           |                                                                                                                                                            |                                                                                                                                                                                                                                                                                                                                                                                                                                                                                                                                                                                                                                                                                                                                                                                                                                                                                                                                                                                                                                                                                                                                                                                                                                                                                                                                                                                                                                                                                                  |
|-----------------------------------------------------------|------------------------------------------------------------------------------------------------------------------------------------------------------------|--------------------------------------------------------------------------------------------------------------------------------------------------------------------------------------------------------------------------------------------------------------------------------------------------------------------------------------------------------------------------------------------------------------------------------------------------------------------------------------------------------------------------------------------------------------------------------------------------------------------------------------------------------------------------------------------------------------------------------------------------------------------------------------------------------------------------------------------------------------------------------------------------------------------------------------------------------------------------------------------------------------------------------------------------------------------------------------------------------------------------------------------------------------------------------------------------------------------------------------------------------------------------------------------------------------------------------------------------------------------------------------------------------------------------------------------------------------------------------------------------|
| Background information                                    | <ul style="list-style-type: none"> <li>- Explore personal background</li> <li>- Level of experience</li> <li>- Own roles and tasks as an editor</li> </ul> | <ul style="list-style-type: none"> <li>• Tell me about your journal and the job you have.</li> <li>• How long have you been in this position?</li> </ul> <p><b>Prompt:</b> percentage of time devoted to editorial duties (e.g., part time, full time)</p> <ul style="list-style-type: none"> <li>• What are your current responsibilities?</li> <li>• Did you hold any other editorial position before your current position? If yes, what were your responsibilities then?</li> </ul>                                                                                                                                                                                                                                                                                                                                                                                                                                                                                                                                                                                                                                                                                                                                                                                                                                                                                                                                                                                                          |
| Journal set-up                                            | <ul style="list-style-type: none"> <li>- Explore journal set-up</li> </ul>                                                                                 | <ul style="list-style-type: none"> <li>• Tell me about your journal - how does it work?</li> </ul> <p>Prompt: availability of editorial support staff</p> <ul style="list-style-type: none"> <li>• How does the peer review process work in your journal?</li> <li>• What do you do within the process?</li> </ul>                                                                                                                                                                                                                                                                                                                                                                                                                                                                                                                                                                                                                                                                                                                                                                                                                                                                                                                                                                                                                                                                                                                                                                               |
| Opinion on peer reviewers role and tasks                  | <ul style="list-style-type: none"> <li>- Roles and tasks of peer reviewers</li> <li>- Expectations</li> </ul>                                              | <ul style="list-style-type: none"> <li>• What do you expect from peer reviewers in terms of their roles and tasks?</li> <li>• How do you let your reviewers know what you expect from them?</li> </ul> <p><b>Prompt</b> on whatever has not been mentioned:</p> <ul style="list-style-type: none"> <li>• Attitudes and beliefs (about role and tasks)</li> <li>• Organisational expectations (about role and tasks)</li> </ul> <ul style="list-style-type: none"> <li>• Can you tell me about a specific situation when you were not satisfied with a review or with a peer reviewer?</li> <li>• What did you do in that a situation?</li> </ul> <p><b>Prompt:</b> looks for factors other than being late with a review, or not doing a review once you they have accepted it</p> <ul style="list-style-type: none"> <li>• Can you tell me about a situation when you were exceptionally satisfied with a review or with a peer reviewer?</li> <li>• Were there situations (in regards to the roles and task of reviewers) when you disagreed with the other editors you work with? What about? What happened?</li> <li>• What about other journals, do roles and tasks differ among journals in your field?</li> </ul> <p><b>Prompt:</b> If yes (i.e. differences exist), then:</p> <ul style="list-style-type: none"> <li>• How does this affect the process?</li> <li>• How does it affect your communication?</li> <li>• How do you negotiate those differences? Does it matter?</li> </ul> |
| Communication between editors, peer reviewers and authors | <ul style="list-style-type: none"> <li>- Communication between the three parties</li> <li>- Potential conflicts</li> <li>- Power</li> </ul>                | <ul style="list-style-type: none"> <li>• Can you describe your experience of the communication process between editors, authors and peer reviews?</li> <li>• How do you communicate with authors and peer reviewers?</li> <li>• Can you give me some specific examples of situations where this communication is challenging?</li> </ul>                                                                                                                                                                                                                                                                                                                                                                                                                                                                                                                                                                                                                                                                                                                                                                                                                                                                                                                                                                                                                                                                                                                                                         |

|            |                                                                                                                |                                                                                                                                                                                                                                                                          |
|------------|----------------------------------------------------------------------------------------------------------------|--------------------------------------------------------------------------------------------------------------------------------------------------------------------------------------------------------------------------------------------------------------------------|
|            |                                                                                                                | <p><b>Prompt:</b><br/>         What are potential conflicts?<br/>         When do disagreements arise?<br/>         What happens if there is disagreement between peer reviewers?</p>                                                                                    |
| Conclusion | <ul style="list-style-type: none"> <li>- Snowballing</li> <li>- Documents</li> <li>- Final comments</li> </ul> | <ul style="list-style-type: none"> <li>• Is there anybody else whom you think I should speak to?</li> <li>• Any articles/documents I can access/should look at?</li> <li>• Any final comments? Is there anything else that you think is important to mention?</li> </ul> |

### Data collection and recording

All interviews will be conducted by the principal researcher (KG) either face-to-face or by phone or online call (e.g. Skype or conferencing system), according to the circumstances and preferences of the interviewees.

With the permission of the participants, interviews will be audio-recorded and notes will be taken.

Interviewees will be asked if they could be contacted again if further clarification is needed.

Based on the pilot interviews it is anticipated that interviews will take around 30 minutes to complete.

### Data analysis

Data will be analysed using Braun and Clarke's six phase thematic analysis (TA) described as "a method for identifying, analysing and reporting patterns (themes) within data" (21). This analytic framework assumes that truth can be accessed through language, but that accounts and experiences are socially mediated (31).

It is not bound to any pre-existing theoretical framework, therefore it offers relative theoretical independence and compatibility with various approaches which is compatible with pragmatist position that we subscribe to (32). TA has also been described as a more accessible form of analysis compared to other approaches that requires less detailed theoretical and technical knowledge, and is therefore particularly suitable for the lead researcher (KG) of this study who is at an early stage of her qualitative research experience (21). The principal researcher (KG) will conduct all interviews, which will be transcribed verbatim.

Data analysis will take place concurrently with data collection in an iterative cycle. This serves two purposes; firstly, it will help to further refine the topic guide, and allow the interviewer (KG) to reflect with the senior investigator (DH) on her own interviewing technique and style for subsequent interviews. Secondly, it will help the researchers to determine when saturation occurs.

The six phases of TA analysis consist of: familiarizing with the data, generating initial codes, searching for themes, reviewing themes, defining and naming themes, producing the report.

The first phase will start by familiarizing with the data - re-reading each transcript at least twice and noting down initial ideas.

In the second phase initial codes will be generated from the subset of interviews using the inductive approach. The codes will be developed line-by-line from the interview content, focusing

1  
2  
3 on the identification of both semantic (i.e. reflecting the explicit content) and latent (i.e. reflect the  
4 implicit content) features (21). In order to ensure consistency a code manual will be developed by  
5 both researchers (KG and DH) to increase credibility. These codes will be then applied to  
6 subsequent interviews with sensitivity to the possibility of new emerging codes that will be added  
7 to the code manual and applied to the entire dataset in an iterative manner. Coding will be  
8 performed by both researchers KG and DH to increase credibility of the analysis. The qualitative  
9 data analysis software NVivo v.11 will be used to aid data management and analysis (i.e. indexing  
10 of coding and transcripts).

11  
12  
13  
14 In the third phase the codes will be clustered into potential themes to give an indication of their  
15 prevalence for the assessment of (code or meaning) saturation, and into a preliminary thematic  
16 map displaying the main themes.

17  
18 The fourth phase will consist of reviewing themes and will be divided into two stages; the  
19 reviewing and refining of the data at the level of the coded data extracts, and subsequently at the  
20 level of the entire data set. These two stages will lead to the generation of a thematic map of the  
21 analysis.

22  
23 The aim of the next phase will be to definitively define the scope and content of each relevant  
24 theme and precisely name them. This will involve debriefing between the study team. Debriefing  
25 with an outside expert (on peer review in biomedical journals) as suggested by King (33) will be  
26 conducted to ensure that themes are sufficiently clear to someone outside of the immediate  
27 research team.

28  
29 After the establishment of the final themes, the last phase will consist of writing up the study  
30 findings as a journal article. Direct quotes will be used to illustrate specific points of interpretation  
31 and the extraction of themes. All themes and subthemes will be presented in the result section and  
32 discussed in the light of existing literature.  
33  
34  
35  
36  
37

### 38 Securing study quality

39 The most widely used criteria for evaluating qualitative analysis are those developed by Lincoln  
40 and Guba (34), who introduced the concept of 'trustworthiness' to parallel the conventional  
41 quantitative assessment criteria of validity and reliability. Trustworthiness is determined by  
42 applying the concepts of credibility, transferability, dependability and conformability to qualitative  
43 research. Credibility corresponds to the concept of validity, whereby researchers seek to ensure  
44 that a study measures what it is actually intended to measure. Transferability corresponds to  
45 external validity, or the extent to which the research can be transferred to other contexts.  
46 Dependability corresponds with reliability, or whether the research process is methodologically  
47 consistent and correct, whether the research questions are clear and logically connected to the  
48 research purpose and design, and whether findings are consistent and repeatable. Confirmability is  
49 concerned with establishing that the researcher's interpretations and findings are clearly derived  
50 from the data, requiring the researcher to demonstrate how conclusions and interpretations have  
51 been reached (35).  
52  
53  
54  
55  
56  
57

1  
2  
3 In order to establish trustworthiness in this research, the step-by-step approach proposed by  
4 Nowell et al. – which provides a detailed description of how to conduct a trustworthy TA – will  
5 be followed (36). These authors use the criteria by Lincoln and Guba and show how these can be  
6 achieved throughout the 6 phases of TA.

7  
8 We will use reporting guidelines for reporting qualitative research to provide detailed reporting of  
9 methods used (37).

## 12 Patient and Public Involvement

13 There was no patient or public involvement in this research project.

## 16 Discussion

17 This research has multiple potential uses. As a standalone research piece it will generate context-  
18 based information from journal editors' perspectives that will help to provide insight into the  
19 communication patterns within biomedical journals, including differences and similarities across  
20 biomedical journals. It is also embedded within a larger project that will inform the analysis of  
21 peer reviewer reports.

22  
23 The study findings can further be used to inform biomedical journal policies and develop training  
24 courses for peer reviewers and journal editors.

## 28 Ethics and dissemination

29 This project has been evaluated and approved by the University of Split, Medical School Ethics  
30 Committee (2181-198-03-04-17-0029) in May 2017.

31 Interviewees will receive an information sheet about the research and a consent form before the  
32 interview. The information letter includes details on the maintenance of anonymity and  
33 confidentiality throughout the research process. Prior to the interview, information from the  
34 information sheet and consent form will be reiterated verbally, and interviewees will be asked to  
35 consent to participation and recording of their interviews. Participants will be able to choose not to  
36 be directly quoted in any publications resulting from the study.

37  
38 Findings will be disseminated through a publication in a peer-reviewed journal and presentations  
39 at academic conferences and other meetings.

## 48 Acknowledgements

49 The authors would like to thank Professor Erik Cobo for providing advice during the writing of  
50 this protocol and Dr Sara Schroter (BMJ) and Dr Elizabeth Moylan (BMC) for providing guidance  
51 and help on the recruitment strategy of interviewees.

52  
53  
54 **Contributors** All authors have made substantive intellectual contributions to the development of  
55 this protocol. KG conceptualized the study approach and led the writing of the manuscript. DH led

1  
2  
3 the supervision of the manuscript preparation. DH was involved in developing the study questions  
4 and design and provided detailed comments on earlier drafts.  
5  
6

7 **Funding** This project was supported by the European Union's Horizon 2020 research and  
8 innovation programme under the Marie Skłodowska-Curie grant agreement No 676207. The  
9 funders had no role in the study design, data collection and analysis, decision to publish, or  
10 preparation of the manuscripts.  
11  
12

13 **Competing interests** At the time of the submission of this protocol KG conducted a secondment at the  
14 BMJ.  
15  
16  
17  
18  
19  
20  
21  
22  
23  
24  
25  
26  
27  
28  
29  
30  
31  
32  
33  
34  
35  
36  
37  
38  
39  
40  
41  
42  
43  
44  
45  
46  
47  
48  
49  
50  
51  
52  
53  
54  
55  
56  
57  
58  
59  
60

## References

1. Overbeke J, Wager E. 3: The state of evidence: what we know and what we don't know about journal peer review. *JAMA*. 1994;272:79–174.
2. Galipeau J, Barbour V, Baskin P, Bell-Syer S, Cobey K, Cumpston M, et al. A scoping review of competencies for scientific editors of biomedical journals. *BMC Med*. 2016 Feb 2;14:1–17.
3. Moher D, Galipeau J, Alam S, Barbour V, Bartolomeos K, Baskin P, et al. Core competencies for scientific editors of biomedical journals: consensus statement. *BMC Med*. 2017 Sep 11;15(1):167.
4. Chauvin A, Ravaud P, Baron G, Barnes C, Boutron I. The most important tasks for peer reviewers evaluating a randomized controlled trial are not congruent with the tasks most often requested by journal editors. *BMC Med*. 2015;13(1):1.
5. Smith R. Peer review: a flawed process at the heart of science and journals. *J R Soc Med* [Internet]. 2006;99. Available from: <http://dx.doi.org/10.1258/jrsm.99.4.178>
6. Rennie D. Make peer review scientific. *Nature*. 2016;535(7610):31–3.
7. Silva PUKD, Vance CK. Preserving the Quality of Scientific Research: Peer Review of Research Articles. In: *Scientific Scholarly Communication* [Internet]. Springer International Publishing; 2017 [cited 2017 Apr 18]. p. 73–99. (Fascinating Life Sciences). Available from: [http://link.springer.com/chapter/10.1007/978-3-319-50627-2\\_6](http://link.springer.com/chapter/10.1007/978-3-319-50627-2_6)
8. Lee CJ, Sugimoto CR, Zhang G, Cronin B. Bias in peer review. *J Am Soc Inf Sci Technol*. 2013 Jan 1;64(1):2–17.
9. Jefferson T, Rudin M, Brodny Folse S. Editorial peer review for improving the quality of reports of biomedical studies. *Cochrane Database Syst Rev*. 2007;2.
10. Bruce R, Chauvin A, Trinquart L, Ravaud P, Boutron I. Impact of interventions to improve the quality of peer review of biomedical journals: a systematic review and meta-analysis. *BMC Med*. 2016;14(1):85.
11. Altman DG, Schulz KF, Moher D. The revised CONSORT statement for reporting randomized trials: explanation and elaboration. *Ann Intern Med* [Internet]. 2001;134. Available from: <http://dx.doi.org/10.7326/0003-4819-134-8-200104170-00012>
12. Hojat M, Gonnella JS, Caelleigh AS. Impartial judgment by the “gatekeepers” of science: fallibility and accountability in the peer review process. *Adv Health Sci Educ Theory Pract*. 2003;8(1):75–96.
13. Kassirer JP, Champion EW. Peer review: crude and understudied, but indispensable. *Jama*. 1994;272(2):96–7.
14. King CR, McGuire DB, Longman AJ, Carroll-Johnson RM. Peer review, authorship, ethics, and conflict of interest. *Image J Nurs Sch*. 1997 May;29(2):163–7.



15. Horn SA. The Social and Psychological Costs of Peer Review: Stress and Coping With Manuscript Rejection. *J Manag Inq*. 2016 Jan 1;25(1):11–26.
16. Bedeian AG. Peer Review and the Social Construction of Knowledge in the Management Discipline. *Acad Manag Learn Educ*. 2004 Jun 1;3(2):198–216.
17. Lipworth WL, Kerridge IH, Carter SM, Little M. Journal peer review in context: A qualitative study of the social and subjective dimensions of manuscript review in biomedical publishing. *Soc Sci Med*. 2011 Apr;72(7):1056–63.
18. Lipworth W, Kerridge I. Shifting Power Relations and the Ethics of Journal Peer Review. *Soc Epistemol*. 2011 Jan 1;25(1):97–121.
19. Shashok K. Standardization vs Diversity: How Can We Push Peer Review Research Forward? *Medscape Gen Med*. 2005 Feb 16;7(1):11.
20. Yardley L, Bishop F. Mixing Qualitative and Quantitative Methods: A Pragmatic Approach. In: Willig C, Stainton-Rogers W, editors. *Qualitative Research in Psychology*. Thousand Oaks (CA): SAGE Publication Ltd.; p. 352–69.
21. Braun V, Clarke V. Using thematic analysis in psychology. *Qual Res Psychol*. 2006;3(2):77–101.
22. Patton M. *Qualitative Research and Evaluation Methods*, 209-339. 2002;
23. Projet MiRoR | An innovative and ambitious joint doctoral training programme [Internet]. [cited 2017 May 2]. Available from: <http://mirror-ejd.eu/>
24. Rennie D, Flanagan A, Godlee F, Bloom T. The Eighth International Congress on Peer Review and Biomedical Publication: A Call for Research. *JAMA*. 2015 May 26;313(20):2031–2.
25. Fox CW, Burns CS, Meyer JA. Editor and reviewer gender influence the peer review process but not peer review outcomes at an ecology journal. *Funct Ecol*. 2016;30(1):140–53.
26. Morgan DL. Sample size. *Sage Encycl Qual Res Methods*. 2008;798.
27. Marshall B, Cardon P, Poddar A, Fontenot R. Does Sample Size Matter in Qualitative Research?: A Review of Qualitative Interviews in is Research. *J Comput Inf Syst*. 2013 Sep 1;54(1):11–22.
28. Hennink MM, Kaiser BN, Marconi VC. Code Saturation Versus Meaning Saturation: How Many Interviews Are Enough? *Qual Health Res*. 2016;1049732316665344.
29. Fugard AJB, Potts HWW. Supporting thinking on sample sizes for thematic analyses: a quantitative tool. *Int J Soc Res Methodol*. 2015 Nov 2;18(6):669–84.

- 1  
2  
3 30. Glonti K, Cauchi D, Cobo E, Boutron I, Moher D, Hren D. A scoping review protocol on the  
4 roles and tasks of peer reviewers in the manuscript review process in biomedical journals.  
5 BMJ Open. 2017 Oct 1;7(10):e017468.  
6  
7 31. Madill A, Jordan A, Shirley C. Objectivity and reliability in qualitative analysis: realist,  
8 contextualist and radical constructionist epistemologies. *Br J Psychol Lond Engl* 1953. 2000  
9 Feb;91 ( Pt 1):1–20.  
10  
11 32. Creswell JW, Poth CN. *Qualitative inquiry and research design: Choosing among five*  
12 *approaches*. Sage publications; 2017.  
13  
14 33. King N. Using templates in the thematic analysis of text. *Essent Guide Qual Methods Organ*  
15 *Res*. 2004;2:256–70.  
16  
17 34. Lincoln Y, Guba E. *Naturalistic inquiry*. Newbury Park. 1985;  
18  
19 35. Tobin GA, Begley CM. Methodological rigour within a qualitative framework. *J Adv Nurs*.  
20 48(4):388–96.  
21  
22 36. Nowell LS, Norris JM, White DE, Moules NJ. Thematic Analysis: Striving to Meet the  
23 Trustworthiness Criteria. *Int J Qual Methods*. 2017;16(1):1609406917733847.  
24  
25 37. Tong A, Sainsbury P, Craig J. Consolidated criteria for reporting qualitative research  
26 (COREQ): a 32-item checklist for interviews and focus groups. *Int J Qual Health Care*. 2007  
27 Dec 1;19(6):349–57.  
28  
29  
30  
31  
32  
33  
34  
35  
36  
37  
38  
39  
40  
41  
42  
43  
44  
45  
46  
47  
48  
49  
50  
51  
52  
53  
54  
55  
56  
57  
58  
59  
60

1  
2  
3 Appendix 1. Sample size calculation  
4  
5

```
6 sampSizeForQual = function(Power, ThemePrevalence, NumInstances) { qnbinom(Power, size =  
7 NumInstances, prob = ThemePrevalence) + NumInstances  
8
```

```
9 }  
10
```

```
11 sampSizeForQual(0.9, 0.1, 2)  
12
```

```
13 [1] 38  
14  
15
```

```
16  
17 Code run via R-Fiddle (http://www.r-fiddle.org)  
18  
19  
20  
21  
22  
23  
24  
25  
26  
27  
28  
29  
30  
31  
32  
33  
34  
35  
36  
37  
38  
39  
40  
41  
42  
43  
44  
45  
46  
47  
48  
49  
50  
51  
52  
53  
54  
55  
56  
57  
58  
59  
60
```
