# Supplementary material for: Editors’ perspectives on the peer-review process in biomedical journals: protocol for a qualitative study
Source: PubMed Central journal article supplement (PMC6196803; doi:10.1136/bmjopen-2017-020568), 2018-10-18
Supplement: bmjopen-2017-020568supp001.pdf [file bmjopen-2017-020568supp001.pdf]

## Appendix 1. Sample size calculation

```
sampSizeForQual = function(Power, ThemePrevalence, NumInstances) { qnbinom(Power, size =  
NumInstances, prob = ThemePrevalence) + NumInstances
```

```
}
```

```
sampSizeForQual(0.9, 0.1, 2)
```

```
[1] 38
```

Code run via R-Fiddle (<http://www.r-fiddle.org>)
